1 **Distinct developmental phenotypes result from mutation of Set8/KMT5A**  
2 **and histone H4 lysine 20 in *Drosophila melanogaster***

3

4

5

6 Aaron T. Crain<sup>1,3</sup>, Stephen Klusza<sup>2,3,8</sup>, Robin L. Armstrong<sup>1,3</sup>, Priscila Santa Rosa<sup>4</sup>,  
7 Brenda R. S. Temple<sup>3,5</sup> Brian D. Strahl<sup>1,2,5</sup>, Daniel J. McKay<sup>1,3,6,7</sup>, A. Gregory  
8 Matera<sup>1,2,3,6,7,\*</sup>, and Robert J. Duronio<sup>1,2,3,6,7,\*</sup>

9

10 <sup>1</sup>Curriculum in Genetics and Molecular Biology, <sup>2</sup>Lineberger Comprehensive Cancer  
11 Center, <sup>3</sup>Integrative Program for Biological and Genome Sciences, <sup>4</sup>UNC PREP,  
12 <sup>5</sup>Department of Biochemistry and Biophysics, <sup>6</sup>Department of Biology, <sup>7</sup>Department  
13 of Genetics, University of North Carolina, Chapel Hill, NC, 27599 USA

14

15 \*Corresponding authors

16

17 <sup>8</sup>Current address: Department of Biology, Clayton State University, Morrow, GA  
18 30260 USA

## 19 **Abstract**

20 Mono-methylation of histone H4 lysine 20 (H4K20me1) is catalyzed by Set8/KMT5A and  
21 regulates numerous aspects of genome organization and function. Loss-of-function mutations in  
22 *Drosophila melanogaster* Set8 or mammalian KMT5A prevent H4K20me1 and disrupt  
23 development. Set8/KMT5A also has non-histone substrates, making it difficult to determine  
24 which developmental functions of Set8/KMT5A are attributable to H4K20me1 and which to  
25 other substrates or to non-catalytic roles. Here, we show that human KMT5A can functionally  
26 substitute for Set8 during *Drosophila* development and that the catalytic SET domains of the two  
27 enzymes are fully interchangeable. We also uncovered a role in eye development for the N-  
28 terminal domain of Set8 that cannot be complemented by human KMT5A. Whereas *Set8<sup>null</sup>*  
29 mutants are inviable, we found that an R634G mutation in the SET domain predicted to ablate  
30 catalytic activity resulted in viable adults, suggesting important non-catalytic functions of Set8.  
31 Similarly, flies that were engineered to express only unmodifiable H4 histones (*H4<sup>K20A</sup>*) can also  
32 complete development, but they are phenotypically distinct from *H4<sup>K20R</sup>*, *Set8<sup>null</sup>*, and *Set8<sup>R634G</sup>*  
33 animals. Taken together, our results demonstrate functional conservation of KMT5A and Set8  
34 enzymes, as well as distinct roles for Set8 and H4K20me1 in *Drosophila* development.

## 35 Introduction

36 The formation of chromatin from DNA and histones regulates genome function and is critical for  
37 development of multicellular organisms. The post-translational modification (PTM) of histone  
38 N-terminal tails modulates the organization of chromatin and thereby helps regulate replication,  
39 repair, and transcription of the genome.<sup>69</sup> Consequently, dysregulation of histone PTMs is  
40 thought to disrupt animal development. However, our understanding of how particular histone  
41 PTMs influence specific developmental processes is incomplete. For instance, methylation of  
42 histone H4 lysine 20 (H4K20me) has been implicated in the control of transcription,<sup>2,9,14,17,38–</sup>  
43 <sup>40,43,44,46,78,90,97,99,105</sup> DNA replication and repair,<sup>9,12,14,26,32,34,42,79,100</sup> chromosome condensation  
44 during mitosis,<sup>9,14,16,40</sup> and heterochromatin assembly,<sup>9,14,61,79,84</sup> but the requirement for these  
45 putative H4K20me functions has not been directly interrogated during animal development.<sup>49</sup>

46 In most animal genomes, H4K20 mono-methylation (H4K20me1) is catalyzed by a  
47 conserved enzyme variably termed KMT5A/Set8/SETD8/PR-Set7 that contains a catalytic SET  
48 domain.<sup>27,61</sup> Subsequent di- and tri-methylation of H4K20 is carried out by SET domain-  
49 containing Suv4-20 enzymes, of which there are two in mammals and one in  
50 *Drosophila*.<sup>9,71,74,92,98</sup> Developmental roles for H4K20me are typically investigated by mutations  
51 that eliminate or alter the activity of these enzymes. Although most of this work has been done  
52 using knockdown methods in cell culture,<sup>2,8,16,17,33,34,36,37,62,64,67,70,80,81,85,86,89,97</sup> a small number of  
53 studies were conducted using mutant animals.<sup>7,27,40,44,63,72,75</sup> For instance, loss of the H4K20me2  
54 methyltransferase Suv4-20h1 in mice causes early developmental defects, resulting in either  
55 embryonic or perinatal lethality.<sup>75</sup> In contrast, animals that lack the H4K20me3  
56 methyltransferase Suv4-20h2 develop normally.<sup>75</sup> *Drosophila Suv4-20* null mutations display no  
57 overt developmental defects, suggesting no essential requirement for H4K20me2 and

58 H4K20me3 in flies.<sup>71</sup> In contrast, loss of H4K20 mono-methyltransferases causes severe  
59 developmental phenotypes: Fly *Set8* (FlyBase annotation *PR-Set7; CG3307*) and mouse *KMT5A*  
60 null mutants are inviable and exhibit a developmental arrest that is accompanied by reduction of  
61 H4K20me and a variety of defects including smaller larval tissues in flies and increased  
62 apoptosis in mouse embryos.<sup>34,40,63,72</sup> Mutant cells also have defects in cell cycle progression and  
63 accumulate DNA damage.<sup>9,14,95</sup> These cellular and developmental defects have been attributed to  
64 loss of downstream functions that require H4K20 methylation. Consistent with this  
65 interpretation, a *KMT5A* R265G mutation predicted to abolish catalytic activity does not support  
66 embryonic development,<sup>63</sup> suggesting that *KMT5A* catalytic activity is required for proper  
67 mouse development.

68 Each of these analyses is confounded by observations that Set8-family enzymes have  
69 protein substrates in addition to H4K20.<sup>23,34,76,83</sup> Moreover, many of these other substrates, such  
70 as p53 and PCNA (Proliferating Cell Nuclear Antigen), regulate critical aspects of genome  
71 function.<sup>23,76,83,93</sup> Finally, recent work from our group using engineered *Drosophila* histone  
72 mutant genotypes demonstrated that H4K20 is dispensable for DNA replication and organismal  
73 viability.<sup>49</sup> Thus, the contributions of H4K20me to animal development are not fully determined.

74 Here, we compare phenotypes caused by mutation of *Set8* and *H4K20* in *Drosophila*. The  
75 data show that the essential function played by Set8 in fly development is either non-catalytic or  
76 is largely independent of its histone H4K20 methylation activity. We also demonstrate that  
77 human *KMT5A* can functionally substitute for loss of *Set8* in *Drosophila*, indicating that flies  
78 can provide critical information about evolutionarily conserved functions of H4K20 mono-  
79 methyltransferases during development.

80

## 81 **Results**

### 82 **Set8 is the appropriate designation for the *Drosophila* H4K20 mono-methyltransferase**

83 The *Drosophila melanogaster* genome encodes fourteen SET [Su(var)3-9, Enhancer-of-zeste,  
84 Trithorax] domain lysine methyltransferases (FlyBase)<sup>24,35,56,57,74,77</sup> (Figure 1). A related family  
85 of proteins, called PRDMs, is characterized by the presence of a PR domain [PRDF1 (positive  
86 regulatory domain I-binding factor 1) and RIZ1 (retinoblastoma protein-interacting zinc finger  
87 gene 1)] along with a variable number of Cys2-His2 (C2H2) zinc fingers.<sup>88</sup> The PR domain is an  
88 evolutionarily recent subtype of the SET domain, although not all PRDMs encode active  
89 methyltransferases.<sup>88</sup> There are four PRDM proteins (Blimp-1, Hamlet, CG43347, Prdm13) in  
90 insect genomes whereas this family has expanded to nineteen proteins in humans.<sup>29,48,88</sup>

91 In *Drosophila*, the protein encoded by *PR-Set7/CG3307* is orthologous to the human  
92 H4K20 methyltransferase SETD8/KMT5A and it neither contains a PR domain nor any  
93 predicted zinc finger motifs<sup>15,27,61</sup> (Figure 1). In contrast, human PRDM7 (PR/SET Domain 7) is  
94 an H3K4 methyltransferase that is most closely related to the KRAB and Zn finger domain  
95 protein, PRDM9<sup>10</sup> (Figure 1). Moreover, human SETD7/Set7/Set9 is yet another human H3K4  
96 methyltransferase<sup>91</sup> distinct from *Drosophila* PR-Set7/CG3307 (Figure 1). To avoid further  
97 confusion, we propose to officially rename *CG3307* as *Set8* and refer to this protein as Set8  
98 throughout the manuscript.

### 99 **Human KMT5A rescues loss of Set8 in *Drosophila***

100 KMT5A and Set8 are essential for the development of mice and flies, respectively, and mutating  
101 these enzymes results in defects in cell cycle progression, DNA damage response, and chromatin  
102 compaction in both organisms.<sup>40,63,70</sup> The SET domains of Set8 and human KMT5A are 57%  
103 identical (Supplemental figure 1). Therefore, we hypothesized that KMT5A and Set8 perform the

104 same biological functions in *Drosophila* and mammals and that human KMT5A would rescue  
105 loss of Set8 in *Drosophila*. To test this hypothesis, we engineered a *KMT5A* open reading frame  
106 that was codon-optimized for translation in *Drosophila* and expressed in the context of the native  
107 *Set8* gene (a 4774 bp genomic fragment including 1325 bp upstream of the ORF and 2021 bp  
108 downstream of the ORF including both native 5' and 3' UTRs). Using this engineered *KMT5A*  
109 allele, we generated transgenes located on the same chromosome as the *Set8*<sup>20</sup> null allele<sup>40</sup>  
110 (Figure 2A). Whereas *Set8*<sup>20/20</sup> mutants die as early pupae, animals expressing KMT5A in a  
111 *Set8*<sup>20/20</sup> background pupate normally and complete development at similar frequencies as wild  
112 type animals or *Set8*<sup>20/20</sup> animals rescued with a control *Set8* transgene (Figure 2B, C). Although  
113 *Set8*<sup>20/20</sup> animals rescued by KMT5A are viable and fertile, we observed a rough eye phenotype  
114 in 58% of adult flies (Figure 2E). The *Drosophila* compound eye is a highly organized tissue  
115 containing ~800 photoreception structures termed ommatidia, each composed of eight  
116 photoreceptor neurons and a set of accessory cells. Many processes contribute to proper  
117 formation of the adult eye, including cell cycle progression, cell death, and ultimately cell  
118 differentiation. Disruption of any one of these processes can contribute to ommatidial  
119 irregularities that manifest as a visible “roughness” of the adult eye.<sup>6,94</sup> Even subtle defects in  
120 gene functions required for eye development can result in rough eyes, and thus we conclude that  
121 KMT5A fully rescues most, but not all, Set8 functions in *Drosophila*.

## 122 **The N-terminus of Set8 is dispensable for *Drosophila* viability but plays a role in eye** 123 **development**

124 Although the SET domains of Set8 and KMT5A are 57% identical, the full-length proteins are  
125 only 21% identical (Supplemental figure 1). The N-terminal region (554aa) of Set8 is predicted  
126 to be largely unstructured and is not well-conserved with KMT5A (Figure 2A). A multiple

127 protein alignment of 301 BLAST hits with greater than 50% identity to the full-length Set8  
128 protein revealed that this N-terminal region of Set8 is unique to flies (order Diptera), whereas the  
129 SET domain is highly conserved across all represented organisms (Figure 2D). To test whether  
130 the N-terminal region of Set8 functions in *Drosophila* development we engineered a transgene  
131 encoding a Set8 protein lacking the first 339 amino acids (*Set8<sup>ΔN</sup>*), which would produce a  
132 protein the size of KMT5A (Figure 2A). The *Set8<sup>ΔN</sup>* transgene rescued *Set8<sup>20/20</sup>* lethality resulting  
133 in fully viable and fertile adults with a highly penetrant (82%) rough eye phenotype (Figure 2B,  
134 C, E). Although we were unable to assess the protein accumulation of *Set8<sup>ΔN</sup>* because the epitope  
135 recognized by the Set8 antibody is within the N-terminal region, these results indicate that the N-  
136 terminal 339 amino acids are dispensable for normal development except in the eye. To test  
137 whether the eye function could be provided by KMT5A, we generated a chimeric transgene with  
138 the Set8 N-terminus (1-554) fused to the KMT5A C-terminus (N-Set8::KMT5A-C) and a  
139 reciprocal chimeric transgene with the KMT5A N-terminus (1-214) fused to the Set8 C-terminus  
140 (N-KMT5A::Set8-C). Both transgenes fully rescued viability and fertility of *Set8<sup>20/20</sup>* mutants  
141 (Figure 2 B, C). Further, *N-KMT5A::Set8-C* animals displayed a rough eye phenotype like  
142 *KMT5A* and *Set8<sup>ΔN</sup>* animals (Figure 2E). By contrast, flies expressing the *N-Set8::KMT5A-C*  
143 chimera were fully viable and fertile with morphologically normal eyes, indicating the human  
144 KMT5A SET domain is functionally equivalent to that from *Drosophila* Set8 (Figure 2B, C). We  
145 conclude that the N-terminal 339 amino acids of Set8 are dispensable for *Drosophila* viability  
146 and fertility but have a function in eye development that cannot be provided by the first 214  
147 amino acids of human KMT5A.

148

149 **A SET domain mutation predicted to block methyltransferase activity does not result in a**  
150 **Set8 null phenotype**

151 Many of the established roles for the KMT5A/Set8 lysine methyltransferase have been attributed  
152 to its catalytic activity, primarily by using cell culture-based  
153 assays.<sup>2,8,16,17,33,34,36,37,62,64,67,70,80,81,85,86,89,97</sup> To determine whether methyltransferase activity is  
154 required for Set8 function during *Drosophila* development, we engineered point mutations in the  
155 SET domain that are predicted to ablate catalytic activity<sup>27,61</sup> (Figure 3A). SET domains are  
156 highly conserved and contain evolutionarily invariant residues within the catalytic core (Figure  
157 3B). As shown in Figure 3C, two of these residues (R634 and H638) make critical contacts with  
158 the methyl donor, S-adenosyl methionine (SAM). Mutation of the homologous Arg residue in the  
159 human enzyme (R265) to Gly blocks methyltransferase activity *in vitro* using nucleosomal  
160 substrates, and this substitution has been used in numerous studies of Set8/KMT5A proteins to  
161 create catalytically inactive enzymes.<sup>1,2,17,26,33,38,61,63,76,80,84,86,96</sup> We therefore engineered a  
162 *Set8*<sup>R634G</sup> mutation (hereafter *Set8*<sup>RG</sup>) in the context of the rescuing genomic fragment used in the  
163 experiments above. We also engineered an R634G, H638L double mutation (hereafter *Set8*<sup>RGHL</sup>).  
164 Using *in silico* structural models based on the solved human KMT5A structure and molecular  
165 dynamics simulations (Figure 3C), each of these amino acid changes were evaluated for their  
166 impact on SAH binding and H4 peptide binding. While H4 peptide binding was minimally  
167 impacted, the mutations were shown to disrupt SAH binding and thus are predicted to reduce or  
168 eliminate methyltransferase activity of the mutant Set8 proteins (Figure 3C, D).

169 We inserted *Set8*<sup>RG</sup> and *Set8*<sup>RGHL</sup> transgenes into the same chromosomal landing site used  
170 for the KMT5A rescue experiments (Figure 2A). We then assessed expression of these  
171 transgenes in a *Set8*<sup>20/20</sup> background by immunoblot analysis of third instar larval brain extracts.



172 As demonstrated previously, there is no detectable Set8 protein in *Set8<sup>20/20</sup>* homozygous null  
173 mutant animals<sup>40</sup> (Figure 3E). The Set8(RGHL) mutant protein accumulates to about 10% of  
174 Oregon-R wild-type control (Figure 3E, F), suggesting that binding of the SAM cofactor  
175 stabilizes Set8 protein. Consistent with this result, *Set8<sup>RGHL</sup>* animals are phenotypically similar to  
176 *Set8<sup>20/20</sup>* null mutants, arresting development as early pupae (Figure 4A, B). Interestingly,  
177 *Set8<sup>RGHL</sup>* wandering larvae accumulate melanotic masses that we did not observe in *Set8<sup>null</sup>*  
178 animals. This phenotype is associated with immune response and was previously reported to be  
179 variably expressive and penetrant in both *Set8<sup>20</sup>* and *Set8<sup>l</sup>/Df(3R)red3l* animals.<sup>55</sup> In contrast,  
180 levels of the Set8(RG) missense protein are comparable to those of wild type Set8 expressed  
181 from a control *Set8<sup>WT</sup>* transgene (Figure 3E, F), indicating that the R634G mutation does not  
182 impact protein stability. The *Set8<sup>RG</sup>* transgene rescues the early pupal lethality observed in  
183 *Set8<sup>20/20</sup>* mutants, but only ~50% of the *Set8<sup>RG</sup>* animals eclose as adults compared to the *Set8<sup>WT</sup>*  
184 control (Figure 4A, B). A majority of *Set8<sup>RG</sup>* mutant flies had rough eyes (86%, Figure 4C), as  
185 was previously shown for flies harboring the *Set8<sup>l</sup>* hypomorphic mutation, which is caused by a  
186 P-element insertion in the 5'-UTR.<sup>27,40,61</sup> *Set8<sup>RG</sup>* also behaves as a hypomorphic allele, as animals  
187 containing two *Set8<sup>RG</sup>* transgenes have a less severe phenotype than those containing one (Figure  
188 4B). These data indicate that the *Set8<sup>RG</sup>* allele is not null, and thus Set8(RG) protein retains at  
189 least some Set8 function *in vivo*.

190 To further characterize the *Set8<sup>RG</sup>* mutant, we more closely evaluated the process of  
191 pupariation in our collection of *Set8* mutants. Easily recognizable developmental events occur  
192 during the larval to pupal transition in *Drosophila*, including eversion of the anterior spiracles  
193 and gas bubble translocation from the posterior to anterior end of the pupa. Whereas *Set8<sup>+/20</sup>*  
194 heterozygotes and *Set8<sup>l/20</sup>* hypomorphs progress normally through these developmental

195 milestones, *Set8*<sup>20/20</sup> mutants fail to complete both anterior spiracle eversion and gas bubble  
196 translocation, resulting in pupae with increased length compared to control and *Set8*<sup>I/20</sup>  
197 hypomorphs (Figure 4D). *Set8*<sup>RG</sup> animals displayed a slight defect in completion of these  
198 pupariation events compared to *Set8*<sup>WT</sup> control animals. Pupariation defects observed in *Set8*<sup>RGHL</sup>  
199 animals were like those in *Set8*<sup>20/20</sup> mutants. Interestingly, *Set8*<sup>RG</sup> mutants also displayed a slight  
200 increase in pupal length compared to *Set8*<sup>WT</sup> controls that did not reach the severity observed in  
201 *Set8*<sup>20/20</sup> mutants (Figure 4D). These data demonstrate that the SET catalytic domain mutant  
202 *Set8*<sup>RG</sup> displays intermediate pupariation defects between wild type and null alleles of *Set8*,  
203 suggesting that successful completion of the larval to pupal transition may require both catalytic  
204 and non-catalytic functions of *Set8*.

#### 205 **Mutants of H4K20 and *Set8* are phenotypically distinct**

206 Mutation of lysine methyltransferases can result in disruption of multi-protein complexes,  
207 causing pleiotropic phenotypes independent of histone methylation.<sup>20,31,45,82,87,107</sup> In addition,  
208 *Set8* has non-histone substrates and non-catalytic functions.<sup>23,26,34,76,80,83,100,108</sup> Thus, one cannot  
209 conclusively determine functional roles for H4K20me solely by mutating *Set8*. Another genetic  
210 strategy to address the contribution of H4K20me to various genomic processes is to change  
211 H4K20 to a residue that cannot be modified by *Set8*. However, this genetic strategy is not  
212 usually employed in metazoan systems because in these organisms the replication-dependent  
213 (RD) histones (H1, H2A, H2B, H3, and H4) are encoded by multiple genes located at different  
214 loci, making genetic manipulation extremely difficult. In contrast, in *Drosophila melanogaster*  
215 all ~100 replication-dependent histone genes are tandemly arrayed at a single locus that can be  
216 removed with a single genetic deletion. The early developmental arrest caused by homozygosity  
217 of this deletion can be rescued with a single, ectopic transgene encoding 12 tandemly arrayed

218 histone wild type gene repeats (HWT; Figure 5A, see Meers et al. 2018<sup>52</sup> for details on array  
219 construction). This strategy allows us to engineer histone genotypes encoding mutant histone  
220 proteins in which a given residue is changed to one that is not a substrate for its cognate  
221 modifying enzyme.<sup>5,41,49–52,65,66</sup>

222 Using this strategy, we demonstrated previously that  $H4^{K20A}$  mutant animals can survive  
223 to adulthood<sup>49</sup> (Figure 5C, D). By contrast, 100% of  $Set8^{20/20}$  null animals die as larvae or early  
224 pupae<sup>40</sup> (Figure 2C). This stark phenotypic difference between  $H4^{K20A}$  and  $Set8$  mutants suggests  
225 that certain  $Set8$  phenotypes might not be due to loss of H4K20me, but rather to loss of  
226 methylation of its non-histone substrates or non-catalytic functions. To investigate this disparity  
227 further, we first generated  $H4^{K20R}$  mutants<sup>52</sup> and compared the resulting phenotypes to those of  
228  $H4^{K20A}$  animals as well as of  $Set8$  mutants. Whereas a fraction of  $H4^{K20A}$  mutants can survive to  
229 adulthood, we found that all  $H4^{K20R}$  mutants fail to eclose as adults, although some reach the  
230 pharate adult stage (Figure 5C, D). In addition,  $H4^{K20R}$  animals pupate much less frequently than  
231 either  $H4^{K20A}$  mutants or  $H4^{HWT}$  controls. Notably, the  $H4^{K20R}$  mutant pupae are much smaller  
232 and shorter than either  $H4^{HWT}$  control or  $H4^{K20A}$  mutant pupae, indicating a growth defect (Figure  
233 5E, F). Despite this defect, we did not detect a change in cell cycle progression by FACS  
234 analysis of cells from  $H4^{K20R}$  wing imaginal discs (Figure 5B). In contrast,  $H4^{K20A}$  cells  
235 accumulate in G2 relative to controls, with a concomitant reduction in S phase (Figure 5B).  
236 Notably,  $Set8$  deficient cells arrest in G2/M in both flies and mammalian cell culture.<sup>14,40</sup> Taken  
237 together with the overall eclosion frequency differences, these data demonstrate that the  $H4^{K20R}$   
238 mutation is more severe than the  $H4^{K20A}$  mutation developmentally, but that each mutation  
239 influences cellular mechanisms in unique ways (See Discussion).

240 One complication of these studies is that the fruitfly genome contains a single-copy  
241 replication-independent H4 gene (*His4r*) on chromosome 3 (i.e., located outside of the RD  
242 histone gene array on chromosome 2). *His4r* encodes an H4 protein that is identical to the RD  
243 H4<sup>3</sup>. Although this gene is non-essential (Figure 5C, D), we and others have found that *His4r* can  
244 partially compensate for loss of RD H4.<sup>5,19,28,49</sup> Therefore, we used CRISPR-Cas9 to engineer  
245 two *His4r* alleles (a deletion<sup>5</sup>, *His4r<sup>Δ</sup>*<sup>5</sup> and a K20A mutant, *His4r<sup>K20A</sup>*) and we combined them  
246 with the appropriate RD histone mutant genotypes (Figure 5A). As shown in Figures 5C and D,  
247 homozygous loss of *His4r* in an *H4<sup>K20A</sup>* background (*H4<sup>K20A</sup>*, *His4r<sup>Δ/Δ</sup>*) reduces viability, but does  
248 not eliminate it, indicating that *His4r* expression is important for the observed viability of *H4<sup>K20A</sup>*  
249 mutants but is not required. Expressing one copy of *His4r<sup>K20A</sup>* further reduces viability (Figure  
250 5C, D), suggesting a dominant toxicity of the H4K20A protein. In contrast, deleting *His4r* in an  
251 *H4<sup>K20R</sup>* background did not appreciably change the lethal period of *H4<sup>K20R</sup>* animals (Figure 5C,  
252 D).

253 We next compared H4K20 and Set8 mutant phenotypes, focusing on pupariation and eye  
254 development. In contrast to *Set8<sup>20/20</sup>* null mutants, which display defects during pupariation,  
255 >80% of the *H4<sup>K20A</sup>* and *H4<sup>K20R</sup>* animals complete proper anterior spiracle eversion and gas  
256 bubble translocation. Similarly, the viable *Set8<sup>RG</sup>* and *Set8<sup>1/20</sup>* mutants did not exhibit defects in  
257 anterior spiracle eversion or gas bubble translocation. Both *Set8<sup>RG</sup>* and *Set8<sup>1/20</sup>* mutants have  
258 rough eyes<sup>27</sup> (Figure 4C), indicating that Set8 is required for eye development. In contrast, none  
259 of the *H4<sup>K20A</sup>* mutants had rough eyes when *His4r* was present, whereas ~21% of *H4<sup>K20A</sup>*,  
260 *His4r<sup>Δ/Δ</sup>* animals only had mild disorganization of interommatidial bristles (Figure 5G). These  
261 results suggest that the roles of Set8 and H4K20me in eye development are distinct, and further  
262 highlight that the differential effects of Ala and Arg substitutions at H4K20. We conclude that

263 H4K20me does not mediate all functions of Set8 because mutating H4K20 and Set8 cause  
264 different developmental phenotypes.

## 265 **Discussion**

266 We use genetic and genomic approaches in *Drosophila* to investigate how histone PTMs, and the  
267 enzymes that install them, contribute to animal development. It is particularly informative to  
268 determine where these contributions differ. Our results indicate that only a subset of the essential  
269 functions of the H4K20 mono-methyltransferase, Set8, are mediated by H4K20me. The data also  
270 reveal that, although H4K20me is formally dispensable for completion of development, the lysine  
271 residue nonetheless plays an important role.

### 272 ***Drosophila* Set8 and human KMT5A are orthologous**

273 We showed that human KMT5A can substitute for all Set8 functions during *Drosophila*  
274 development, except in the eye, where we observe a minor disruption in ommatidial organization  
275 that manifests as a rough eye in *KMT5A*-rescued adults. The eye phenotype likely does not result  
276 from changes in methylation of substrates, as we found that the human KMT5A SET domain can  
277 fully substitute for that of Set8, even in the eye. Rather, full developmental eye function is  
278 instead provided by the non-catalytic amino terminal 339 amino acids of Set8, which is  
279 conserved in other Diptera, but not in humans or other vertebrates and invertebrates.

280 Nonetheless, we found that the rough eye phenotype was more penetrant in *Set8<sup>ΔN</sup>*-rescued  
281 animals than it was in the *KMT5A*-rescued animals. We designed *Set8<sup>ΔN</sup>* to be the same size as  
282 KMT5A and retain the conserved PIP degron and Cdk consensus phosphorylation site<sup>96</sup> found in  
283 KMT5A, which therefore might provide some function during eye development. Because  
284 KMT5A can perform nearly all the biological functions of Set8 in *Drosophila*, studies of Set8

285 could be applicable to human biology and disease, particularly because aberrant levels of  
286 KMT5A are implicated in the development of and increased risk in certain breast, brain, and  
287 liver cancers.<sup>18,22,54,59,76,83,97,104,106</sup> KMT5A has also been shown to regulate androgen receptor-  
288 mediated transcription in prostate cancer.<sup>99</sup>

### 289 **Mutation of the SET domain does not abolish *in vivo* function of Set8**

290 Whether methyltransferase activity is required for all the cellular and developmental roles of  
291 SET domain proteins remains an open question in the field. This question is generally addressed  
292 by testing the *in vivo* function of “catalytically dead” enzymes. Previous *in vitro* studies showed  
293 that an R265G mutation eliminates catalytic activity of KMT5A.<sup>60</sup> We found that the  
294 corresponding *Set8*<sup>R634G</sup> mutation does not cause a null mutant phenotype and supports  
295 development into viable adults. This result suggests that methylation of both H4K20 and non-  
296 histone substrates of Set8 is not required for completion of development in *Drosophila*.  
297 However, we do not know whether *Set8*<sup>RG</sup> flies retain some H4K20 methylation. Thus, one  
298 possibility is that an enzyme other than Set8 could methylate H4K20 in *Set8* mutant animals, but  
299 the levels of H4K20me attained would not provide full biological function. Another possibility is  
300 that the *Set8*<sup>RG</sup> mutant is a catalytic hypomorph *in vivo*. Consistent with this possibility, the  
301 *Set8*<sup>RG</sup> mutant phenotype resembles that of the previously described *Set8*<sup>I</sup> hypomorphic mutant  
302 (viable with rough eyes),<sup>27,40</sup> and we found that two copies of the *Set8*<sup>RG</sup> transgene provide more  
303 function than one copy, indicating that *Set8*<sup>RG</sup> is a genetic hypomorph. In addition, our structural  
304 analyses revealed that R634G disrupts interactions within the SAM binding domain but does not  
305 eliminate the possibility that SAM and K20 might still occupy the active site of the enzyme,  
306 albeit less avidly. Notably, other studies have concluded that catalytic activity is not required for

307 *in vivo* function of the H3K4 mono-methyltransferase (Mll3/4, Trr).<sup>25,68</sup> Thus, critical non-  
308 catalytic roles of histone methyltransferases may be the norm rather than the exception.

### 309 **Comparative genetic analyses support distinct developmental roles for Set8 and H4K20me**

310 Our analysis of H4K20 mutants is consistent with the idea that Set8 provides essential functions  
311 during metazoan development that do not include H4K20 methylation. Animals entirely lacking  
312 H4K20me ( $H4^{K20A}$ ,  $His4r^{\Delta/\Delta}$  and  $H4^{K20A}$ ,  $His4r^{K20A/\Delta}$ ) can develop into adults with no obvious  
313 morphological defects, whereas all animals lacking the H4K20 methyltransferase ( $Set8^{20/20}$ ) die  
314 in early pupal stages. This difference in phenotype supports the hypothesis that  $Set8^{20/20}$   
315 inviability is due, at least in part, to loss of non-histone substrate methylation and/or non-  
316 catalytic functions of Set8. Nevertheless, H4K20 is clearly quite important, as only a small  
317 fraction of  $H4^{K20A}$  mutants complete development and  $H4^{K20R}$  mutants are inviable. Moreover,  
318 ectopic expression of H4K20A mutant histones in cultured human cells supports a role for  
319 H4K20me in S phase progression, particularly in late replicating heterochromatin.<sup>13</sup>

320 The phenotypic differences we observe between  $H4^{K20A}$  and  $H4^{K20R}$  mutants are  
321 intriguing, as both substitutions are expected to eliminate H4K20me. The differences may well  
322 be attributable to idiosyncratic structural properties of H4A20- vs. H4R20-containing  
323 nucleosomes, relative to wild type. In particular, the side chains of Alanine and Arginine differ in  
324 both size and charge and thus may differentially impact interaction of the H4 tail with chromatin  
325 binding complexes irrespective of H4K20 methylation. For instance, proteins that bind  
326 unmethylated H4K20 (BRCA1-BARD1) do not recognize H4K20A nucleosomes.<sup>58</sup> Given the  
327 proximity of H4K20 to the nucleosome core, these mutations may variably influence chromatin  
328 structure, or affect the modification of other residues on the H4 tail or on other histones within  
329 the nucleosome. Notably, the assumption that a Lys for Arg substitution would be less

330 detrimental than a Lys for Ala substitution (because Lys and Arg have a similar side chain  
331 structure and are both positively charged) is not born out by our data. Regardless of the precise  
332 mechanism, our genetic analyses provide important insight into H4K20me function *in vivo*, and  
333 suggest that future biochemical, proteomic, and ultrastructural studies of these histone mutants  
334 will be informative.

## 335 **Materials and Methods**

### 336 **Fly stocks and husbandry**

337 Fly stocks were maintained on standard corn medium with molasses provided by Archon Scientific  
338 (Durham). The *Set8<sup>20</sup>* stock used in this study was a generous gift from Ruth Steward. The *Set8<sup>I</sup>*  
339 (#10278) stock was obtained from the Bloomington Stock Center.

### 340 **Set8, KMT5A, and chimeric transgenes**

341 For the *Set8<sup>WT</sup>* transgene a 5493 bp genomic fragment was amplified from a wild type fly extract  
342 using the following primers 5' acttatacacttcattct 3' and 5' taccgcgctgatgcgaattt 3'. The genomic  
343 fragment was cloned into pDEST w+ attB (Supplemental Figure 2). *Set8<sup>RG</sup>* and *Set8<sup>RGHL</sup>* were  
344 constructed using site-directed mutagenesis using the Q5 Site-directed Mutagenesis kit on pDEST  
345 w+ attB *Set8<sup>WT</sup>* (NEB E0554S). KMT5A, *Set8<sup>ΔN</sup>*, N-KMT5A::*Set8*-C, and N-*Set8*::KMT5A-C  
346 sequences were synthesized using GENEWIZ gene synthesis (Supplemental Figure 3) and cloned  
347 into pDEST w+ attB digested with AgeI and MluI (Supplemental Figure 2). Transgenes were  
348 sequence-verified and injected into VK33 on chromosome 3L and screened for positive  
349 transformants by BestGene. Recombinant flies were generated by crossing transgenic flies with  
350 flies containing *Set8<sup>20</sup>* and screening single F2 male progeny for the presence of both the  
351 appropriate transgene and *Set8<sup>20</sup>*.



## 352 **Western blots**

353 Twenty brains from third instar wandering larvae of each genotype were collected in 1xPBS (137  
354 mM NaCl, 2.7 mM KCl, 10 mM Na<sub>2</sub>HPO<sub>4</sub>, 1.8 mM KH<sub>2</sub>PO<sub>4</sub>). 1xPBS was removed, 100 uL of  
355 RIPA buffer (50 mM Tris pH 7.5, 0.1% SDS, 0.5% Sodium Deoxycholate, 1% NP-40, 150 mM  
356 NaCl, 5 mM EDTA)) was added to each sample. Larvae were homogenized in RIPA buffer  
357 using a pestle and incubated on ice for 30 minutes. Samples were then centrifuged for 15 minutes  
358 at top speed at 4C. Supernatant was separated from pellet and protein concentration was assessed  
359 using a Bradford assay. Then 4x Laemmli sample buffer (BioRad 1610747) with 10% β-  
360 mercaptoethanol was added to each sample at a 3:1 ratio. Samples were boiled for 10 minutes  
361 and equal protein (~10 ug) was loaded on a 12% SDS-PAGE gel. Proteins were transferred to a  
362 0.45nm nitrocellulose membrane for 60 minutes at 100V. Membranes were blocked with 5%  
363 milk in 1xTBS-Tween (10mM Tris, 150 mM NaCl, 0.1% Tween20) for 60 minutes then blotted  
364 with primary antibodies (Set8: Novus Biologicals 44710002; β-tubulin: Abcam ab6046) in 5%  
365 milk in 1xTBS-Tween overnight. Blots were quickly washed 3x then for 10 minutes 3x. Blots  
366 were incubated with secondary antibody (goat anti-Rabbit) in 5% milk in 1xTBS-Tween for two  
367 hours at room temperature. Blots were again quickly washed 3x then for 10 minutes 3x. Blots  
368 were then incubated with SuperSignal™ West Pico PLUS Chemiluminescent Substrate (Thermo  
369 Scientific 34580) and imaged using a GE Amersham Imager. Quantification was performed  
370 using FIJI. Briefly, the signal of each band on the Set8 blot and β-tubulin blot was quantified  
371 using a box of equal area. Signal from *Set*<sup>20/20</sup> was subtracted from each Set8 value, then divided  
372 by the corresponding β-tubulin signal for each lane. Finally, the value of *Oregon-R* was set to 1,  
373 so values of all other genotypes are relative to that genotype.

374

375 **Viability assays**

376 To investigate the requirement of Set8 and H4K20me for organismal viability, we enriched  
377 cultures of each genotype for 1<sup>st</sup> instar larvae by manually separating them from their wild type  
378 siblings and monitored survival to pupal and adult developmental stages. Mean pupation and adult  
379 values and pairwise comparisons for each genotype can be found in Supplemental Figure 4.  
380 Crosses to generate histone mutant genotypes were the same as previously reported.<sup>4,52</sup>

381 **CRISPR for *His4r***

382 The *His4r* $\Delta$  allele utilized in this study was the same generated by Armstrong et al. 2018. Here we  
383 generated a point mutation allele (*His4r*<sup>K20A</sup>) using CRISPR-Cas9 mutagenesis. The genomic  
384 region including *His4r* was amplified using the following primers 5'-gctgcccgttagataaagc-3' and  
385 5'-agcaatcggagtccatg-3' and TOPO cloned in pENTR. The codon for His4r<sup>K20</sup> was changed to Ala  
386 using the Q5 Site-directed Mutagenesis kit (NEB E0554S). The same gRNA constructs in pCFD3  
387 from Armstrong et al. 2018 were co-injected with the K20A-mutated *His4r* repair construct into  
388 *Drosophila* embryos expressing Cas9 from the nanos promoter. Positive hits were screened using  
389 a BbsI site created by the Lys to Ala mutagenesis.

390 **Scanning electron microscopy**

391 Flies were dehydrated in ethanol and images of compound eyes were taken using a Hitachi  
392 TM4000Plus table top SEM microscope at 10kV and 150x magnification.

393

394

395

396 **FACS**

397 Wing imaginal disc nuclei from third instar wandering larvae of each genotype were sorted into  
398 G1, S, and G2 populations by a FACSaria II or III based on DAPI intensity as previously  
399 described.<sup>5,53</sup>

400 **Protein sequence analyses**

401 Figure 1A: PRDM and SET domain methyltransferase protein sequences (Supplemental Figure 5)  
402 were compiled and aligned with ClustalOmega using the msa package.<sup>11</sup> A distance matrix was  
403 calculated by identity using dist.alignment in the seqinr package. A phylogenetic tree based on the  
404 distance matrix was generated and then plotted using ggtree.<sup>101–103</sup>

405 Figure 2C: The full-length *Drosophila melanogaster* Set8 protein sequence was BLASTed against  
406 the refseq\_protein database using the default parameters. The top 1000 hits were compiled and  
407 manually sorted to include only one protein isoform per organism. Proteins with percent identities  
408 to the full-length *Drosophila melanogaster* Set8 less than 50% were discarded. Human and mouse  
409 KMT5A proteins were retained for downstream analysis despite having percent identities lower  
410 than 50%. The remaining protein sequences (Supplemental Figure 6) were aligned with  
411 ClustalOmega from the msa package.<sup>11</sup> Phylogenetic classification of each protein was performed  
412 with the taxize package and merged with the alignment information. Proteins with incomplete  
413 classification information were discarded. A phylogenetic tree was generated using the  
414 classification information and plotted using ggtree.<sup>101–103</sup> The alignment of all remaining proteins  
415 was plotted in order of the phylogenetic tree and each position in the alignment was colored based  
416 on whether it matched the residue in the corresponding position of *Drosophila melanogaster* Set8  
417 (blue), Human KMT5A (pink), both *Drosophila melanogaster* Set8 and KMT5A (maroon), or

418 neither *Drosophila melanogaster* Set8 and KMT5A (black). Gaps in the alignment are represented  
419 by white space.

## 420 **Molecular dynamics simulations**

421 Structural models of *Drosophila* WT and mutant Set8/KMT5A in ternary complexes with SAH  
422 (S-adenosyl-L-homocysteine) and H4 peptide were built using the crystallographic structure of  
423 human KMT5A in ternary complex (PDB ID: 1zkk) [PMID 15933070] as template. These  
424 structural models were then used as starting structures for molecular dynamics simulations. Four  
425 replicate explicit solvent simulations with the same starting conformations but different velocity  
426 distributions were completed for WT and each mutant using the Amber v18 software package.<sup>21</sup>  
427 LEaP from the Amber software package was used to generate the explicit solvent systems in an  
428 octahedral box with charge neutralization while the GPU version of PMEMD was used to  
429 complete the simulations.<sup>30,73</sup> The ff14SB force field was used for parameterization.<sup>47</sup> A total of  
430 5,000 steps of minimization were completed, followed by 500 psec heating with an NVT  
431 ensemble, and then density equilibration over 500 psec with an NPT ensemble. The production  
432 run was in the NPT ensemble for a total of 500 nsec. During the production run, Langevin  
433 dynamics with a collision frequency of 1.0 psec<sup>-1</sup> was used for temperature regulation. A  
434 Berendsen barostat with a relaxation time of 1.0 psec was used for pressure regulation. The time-  
435 step was 2 fsec with hydrogen atoms constrained by SHAKE. Trajectories were analyzed for the  
436 distance between atoms in Set8/KMT5A and atoms in either the H4 peptide or SAH.

## 437 **Full genotypes of strains used in this study.**

438  $Set8^{WT}: y-w-;;\{Set8^{WT}\}, Set8^{20/20}$

439  $Set8^{RG}: y-w-;;\{Set8^{RG}\}, Set8^{20/20}$

440  $Set8^{RGHL}: y-w-;;\{Set8^{RGHL}\}, Set8^{20/20}$

- 441 *KMT5A*: y-w-;;{*KMT5A*}, *Set8*<sup>20/20</sup>
- 442 *Set8*<sup>ΔN</sup>: y-w-;;{*Set8*<sup>Δ1-339</sup>}, *Set8*<sup>20/20</sup>
- 443 *N-KMT5A::Set8-C*: y-w-;;{*KMT5A*<sup>1-214</sup> – *Set8*<sup>555-691</sup>}, *Set8*<sup>20/20</sup>
- 444 *N-Set8::KMT5A-C*: y-w-;;{*Set8*<sup>1-554</sup> – *KMT5A*<sup>215-352</sup>}, *Set8*<sup>20/20</sup>
- 445 *HWT*: y-w-; Δ*HisC*; {12x*HWT*}
- 446 *HWT*, *His4r*<sup>Δ/Δ</sup>: y-w-; Δ*HisC*; {12x*HWT*}, *His4r*<sup>Δ/Δ</sup>
- 447 *H4*<sup>K20A</sup>: y-w-; Δ*HisC*; {12x*H4*<sup>K20A</sup>}
- 448 *H4*<sup>K20R</sup>: y-w-; Δ*HisC*; {12x*H4*<sup>K20R</sup>}
- 449 *H4*<sup>K20A</sup>, *His4r*<sup>Δ/Δ</sup>: y-w-; Δ*HisC*; {12x*H4*<sup>K20A</sup>}, *His4r*<sup>Δ/Δ</sup>
- 450 *H4*<sup>K20A</sup>, *His4r*<sup>K20A/Δ</sup>: y-w-; Δ*HisC*; {12x*H4*<sup>K20A</sup>}, *His4r*<sup>K20A/Δ</sup>
- 451 *H4*<sup>K20R</sup>, *His4r*<sup>Δ/Δ</sup>: y-w-; Δ*HisC*; {12x*H4*<sup>K20R</sup>}, *His4r*<sup>Δ/Δ</sup>

## 452 **Data availability**

453 Strains and plasmids available upon request. The authors affirm that all data necessary for  
454 confirming the conclusions of the article are present within the article, figures, and tables.

## 455 **Acknowledgements**

456 A.T.C. and R.L.A. were supported in part by NIH predoctoral traineeships, T32-GM007092. S.K. was  
457 supported in part by an NIH diversity supplement to grant R01-DA036897 (to R.J.D., A.G.M. and B.D.S.)  
458 and by a postdoctoral traineeship, T32-CA009156. This work was supported by NIH grants R35-  
459 GM136435 (to A.G.M) and R01-GM124201 (to R.J.D.). We thank Ruth Steward for generously  
460 providing fly stocks and Megan Butler for critical reading of the manuscript.

## 461 **Figure Legends**

462 **Figure 1. Evolutionary relationship of *Drosophila* and human SET and PRDM containing**  
463 **proteins.** Unrooted tree produced from an alignment of human and *Drosophila* PRDM and SET  
464 domain family proteins using ClustalOmega. *Drosophila* proteins are indicated with bold,

465 underlined text. The red oval highlights the grouping of SET domain family proteins, including  
466 PR-Set7/Set8 and KMT5A (white).

467

468 **Figure 2. Human KMT5A functionally substitutes for Set8 during *Drosophila* development.**

469 A) Diagram of Set8, KMT5A, and Set8/KMT5A chimeric proteins expressed from transgenes  
470 located on chromosome 3, which also contains the *Set8*<sup>20</sup> null allele. Red shading and non-bold,  
471 non-italic numbers indicate Set8 sequence. Gray shading and bold, italic numbers indicate  
472 KMT5A sequence. In parentheses is the total number of amino acids in each protein product. B)  
473 Pupation of *Set8*<sup>WT</sup>, *KMT5A*, and chimera genotypes. Each circle represents the percentage of 40-  
474 50 larvae in a vial that reached pupation. The mean and standard deviation of these percentages  
475 for 8-10 vials are shown for the indicated genotypes. All transgenic genotypes are in the *Set8*<sup>20/20</sup>  
476 homozygous null background. “2x” indicates that each transgene is also homozygous. C)  
477 Ecdysis into adults of *Set8*<sup>WT</sup>, *KMT5A*, and chimera genotypes. Here, each circle represents a  
478 vial of 40-50 larvae, and 8 vials for each of the indicated genotypes were scored. Genotypes are  
479 as in panel B. D) Annotated alignment of Set8-related proteins. 301 homologous proteins with  
480 over 50% identity to Set8 as identified via BLAST were aligned using Clustal Omega and  
481 ordered by phylogeny. Set8 and KMT5A schematics are shown at the top of the diagram with the  
482 SET domains indicated by dark blue boxes. Residues of each protein in the alignment that match  
483 both Set8 and KMT5A exactly are colored dark red. Those that match only Set8 are colored light  
484 blue, and those that match only KMT5A are colored pink. Residues that match neither are  
485 colored black. Gaps in the alignment are indicated by white space. E) SEM images of adult eyes  
486 of flies of the indicated genotypes. The penetrance of flies displaying a phenotype like that  
487 shown is indicated below each image. “1x” and “2x” indicate flies containing either 1 or 2  
488 copies, respectively, of the transgene expressing Set8, KMT5A, or Set8/KMT5A chimeras in the  
489 *Set8*<sup>20/20</sup> homozygous null background.

490

491 **Figure 3. Generation Set8 proteins predicted to be catalytically inactive.**

492 A) Diagram of Set8(WT), Set8(RG) and Set8(RGHL) proteins expressed from transgenes  
493 located on chromosome 3. B) Conservation of the Set8 Arg634 and Leu638 residues (orange  
494 bars) among KMT5A proteins from human, frog, and sea urchin, and among other SET domain  
495 proteins from these species. Asterisks mark where residues are identical across all twelve  
496 proteins. C) Modeling of Set8 with SAH and peptide from H4 bound to the enzyme. Shown are  
497 representative structures after 500ns of molecular dynamics for Set8, Arg634Gly and  
498 Arg634Gly, His638Leu mutations in Set8. D) Total length of time during 500 ns simulations that  
499 ligands remained in binding pocket as measured by distances between key atoms. The two  
500 distance measurements shown were selected because they were the most stable interactions  
501 between Set8 and H4 peptide and between Set8 and SAH. The selected hydrogen bond to the  
502 peptide was also the most stable interaction with the peptide and one of the last to be broken.  
503 Circles represent values from four replicate simulations. E) Western blot of third instar larval  
504 brain extracts from Oregon R wild type and the indicated Set8 mutants using anti-Set8 and anti-

505  $\beta$ -tubulin antibodies. F) Quantification of anti-Set8 signal on western blots by densitometry (see  
506 methods). Shown is the mean and standard deviation of measurements (circles) from technical  
507 replicates across four biological replicates. Oregon-R normalized signal was set to 1 for each  
508 replicate. Significance was determined by a one-way Anova followed by Tukey's multiple  
509 comparison test. \*\*\*\* indicates  $p < .0001$  and ns indicates not significant.

510

#### 511 **Figure 4. The *Set8<sup>RG</sup>* mutant phenotype is not null.**

512 A) Pupation and B) Eclosion into adults of *Set8<sup>RG</sup>* and *Set8<sup>RGHL</sup>* mutants. Each circle represents  
513 the percentage of 40-50 larvae in a vial that reached pupation or adulthood. The mean and  
514 standard deviation of these percentages for 8 vials are shown for the indicated genotypes. Note  
515 that the Oregon R and *Set8<sup>20/20</sup>* data in panels A and B are identical to Figure 2B and 2C,  
516 respectively, and shown here to allow comparison. C) SEM images of adult eyes of flies of the  
517 indicated genotypes. Penetrance and transgene copy number are as in Figure 2 legend. D) Pupal  
518 length was measured for animals of the indicated genotypes. Each symbol represents a single  
519 pupa. Thick bar indicates the mean and thin bars indicate standard deviation. ns indicates not  
520 significant and \*\*\*\* indicates  $p < 0.0001$  by Student's t test.

521

#### 522 **Figure 5. H4K20 mutant phenotypes differ from Set8 mutant phenotypes.**

523 A) Diagram of histone mutant genotypes. A deletion of HisC on the second chromosome is  
524 rescued by a third chromosome containing a transgenic 12x histone gene arrays and either with  
525 or without a mutation of *His4r*. B) FACS analysis of DNA content within cells obtained by  
526 dissociation of larval wing imaginal discs. The percentage of cells in each phase of interphase is  
527 shown for the indicated genotypes. C) Pupation and D) eclosion into adults of different H4  
528 mutants. Each circle represents the percentage of 40-50 larvae in a vial that reached pupation or  
529 adulthood. The mean and standard deviation of these percentages for 8-11 vials are shown for the  
530 indicated genotypes. E) Pupal length was measured for animals of the indicated control and H4  
531 genotypes. Each symbol represents a single pupa. Thick bar indicates the mean and thin bars  
532 indicate standard deviation. \*\* indicates  $p < 0.004$  and \*\*\*\* indicates  $p < 0.0001$  by Student's t  
533 test. F) Representative image used for the pupal length data in panel E. G) SEM images of adult  
534 eyes of flies of HWT control and the indicated H4 mutant genotypes. Rough eye phenotype  
535 penetrance is indicated below each image.

536

#### 537 **References**

538 1. Abbas T, Mueller AC, Shibata E, Keaton M, Rossi M, Dutta A. CRL1-FBXO11 promotes Cdt2  
539 ubiquitylation and degradation and regulates Pr-Set7/Set8-mediated cellular migration. Molecular Cell.

- 540 2013 [accessed 2021 May 3];49(6):1147–1158. <https://pubmed.ncbi.nlm.nih.gov/23478445/>.  
541 doi:10.1016/j.molcel.2013.02.003
- 542 2. Abbas T, Shibata E, Park J, Jha S, Karnani N, Dutta A. CRL4Cdt2 Regulates Cell Proliferation and Histone  
543 Gene Expression by Targeting PR-Set7/Set8 for Degradation. *Molecular Cell*. 2010 [accessed 2019 Jul  
544 24];40(1):9–21. <https://www.sciencedirect.com/science/article/pii/S1097276510007422?via%3Dihub>.  
545 doi:10.1016/J.MOLCEL.2010.09.014
- 546 3. Akhmanova A, Miedema K, Hennig W. Identification and characterization of the *Drosophila* histone H4  
547 replacement gene. *FEBS Letters*. 1996 [accessed 2021 Dec 3];388(2–3):219–222.  
548 <https://onlinelibrary.wiley.com/doi/full/10.1016/0014-5793%2896%2900551-0>. doi:10.1016/0014-  
549 5793(96)00551-0
- 550 4. Armstrong RL, Penke TJR, Chao SK, Gentile GM, Strahl BD, Matera AG, McKay DJ, Duronio RJ. H3K9  
551 Promotes Under-Replication of Pericentromeric Heterochromatin in *Drosophila* Salivary Gland Polytene  
552 Chromosomes. *Genes*. 2019 [accessed 2022 Jan 5];10(2). /pmc/articles/PMC6409945/.  
553 doi:10.3390/GENES10020093
- 554 5. Armstrong RL, Penke TJR, Strahl BD, Matera AG, McKay DJ, MacAlpine DM, Duronio RJ. Chromatin  
555 conformation and transcriptional activity are permissive regulators of DNA replication initiation in  
556 *Drosophila*. *Genome Research*. 2018;28(11):1688–1700. doi:10.1101/gr.239913.118
- 557 6. Baker NE, Li K, Quiquand M, Ruggiero R, Wang LH. Eye development. *Methods*. 2014 [accessed 2020  
558 Dec 12];68(1):252–259. /pmc/articles/PMC4073679/?report=abstract. doi:10.1016/j.ymeth.2014.04.007
- 559 7. Bateman JR, Larschan E, D’Souza R, Marshall LS, Dempsey KE, Johnson JE, Mellone BG, Kuroda MI. A  
560 Genome-Wide Screen Identifies Genes That Affect Somatic Homolog Pairing in *Drosophila*.  
561 G3&#58; Genes|Genomes|Genetics. 2012;2(7):731–740. doi:10.1534/g3.112.002840
- 562 8. Beck DB, Burton A, Oda H, Ziegler-Birling C, Torres-Padilla M-E, Reinberg D. The role of PR-Set7 in  
563 replication licensing depends on Suv4-20h. *Genes & development*. 2012 [accessed 2019 Sep  
564 17];26(23):2580–9. <http://www.ncbi.nlm.nih.gov/pubmed/23152447>. doi:10.1101/gad.195636.112
- 565 9. Beck DB, Oda H, Shen SS, Reinberg D. PR-set7 and H4K20me1: At the crossroads of genome integrity,  
566 cell cycle, chromosome condensation, and transcription. *Genes and Development*. 2012;26(4):325–337.  
567 doi:10.1101/gad.177444.111
- 568 10. Blazer LL, Lima-Fernandes E, Gibson E, Eram MS, Loppnau P, Arrowsmith CH, Schapira M, Vedadi M.  
569 PR Domain-containing Protein 7 (PRDM7) Is a Histone 3 Lysine 4 Trimethyltransferase. *Journal of*  
570 *Biological Chemistry*. 2016;291(26):13509–13519. doi:10.1074/JBC.M116.721472
- 571 11. Bodenhofer U, Bonatesta E, Horejš-Kainrath C, Hochreiter S. msa: an R package for multiple  
572 sequence alignment. *Bioinformatics*. 2015 [accessed 2021 Dec 3];31(24):3997–3999.  
573 <https://academic.oup.com/bioinformatics/article/31/24/3997/197486>.  
574 doi:10.1093/BIOINFORMATICS/BTV494
- 575 12. Botuyan MV, Lee J, Ward IM, Kim J-E, Thompson JR, Chen J, Mer G. Structural Basis for the  
576 Methylation State-Specific Recognition of Histone H4-K20 by 53BP1 and Crb2 in DNA Repair. *Cell*. 2006  
577 [accessed 2019 Jun 7];127(7):1361–1373.  
578 <https://www.sciencedirect.com/science/article/pii/S009286740601525X?via%3Dihub>.  
579 doi:10.1016/J.CELL.2006.10.043
- 580 13. Brustel J, Kirstein N, Izard F, Grimaud C, Prorok P, Cayrou C, Schotta G, Abdelsamie AF, Déjardin J,



- 581 Méchali M, et al. Histone H4K20 tri-methylation at late-firing origins ensures timely heterochromatin  
582 replication. *The EMBO Journal*. 2017;36(18):2726–2741. doi:10.15252/embj.201796541
- 583 14. Brustel J, Tardat M, Kirsh O, Grimaud C, Julien E. Coupling mitosis to DNA replication: The emerging  
584 role of the histone H4-lysine 20 methyltransferase PR-Set7. *Trends in Cell Biology*. 2011;21(8):452–460.  
585 doi:10.1016/j.tcb.2011.04.006
- 586 15. Brustel J, Tardat M, Kirsh O, Grimaud C, Julien E. Coupling mitosis to DNA replication: The emerging  
587 role of the histone H4-lysine 20 methyltransferase PR-Set7. *Trends in Cell Biology*. 2011 [accessed 2019  
588 Sep 24];21(8):452–460.  
589 <https://www.sciencedirect.com/science/article/pii/S0962892411000821?via%3Dihub>.  
590 doi:10.1016/J.TCB.2011.04.006
- 591 16. Centore RC, Havens CG, Manning AL, Li J-M, Flynn RL, Tse A, Jin J, Dyson NJ, Walter JC, Zou L.  
592 CRL4Cdt2-Mediated Destruction of the Histone Methyltransferase Set8 Prevents Premature Chromatin  
593 Compaction in S Phase. *Molecular Cell*. 2010 [accessed 2019 Jul 24];40(1):22–33.  
594 <https://www.sciencedirect.com/science/article/pii/S1097276510007434?via%3Dihub>.  
595 doi:10.1016/J.MOLCEL.2010.09.015
- 596 17. Congdon LM, Houston SI, Veerappan CS, Spektor TM, Rice JC. PR-Set7-mediated monomethylation of  
597 histone H4 lysine 20 at specific genomic regions induces transcriptional repression. *Journal of Cellular*  
598 *Biochemistry*. 2010;110(3):609–619. doi:10.1002/jcb.22570
- 599 18. Congdon LM, Sims JK, Tuzon CT, Rice JC. The PR-Set7 binding domain of Riz1 is required for the  
600 H4K20me1-H3K9me1 trans-tail “histone code” and Riz1 tumor suppressor function. *Nucleic Acids*  
601 *Research*. 2014;42(6):3580–3589. doi:10.1093/nar/gkt1377
- 602 19. Copur Ö, Gorchakov A, Finkl K, Kuroda MI, Müller J. Sex-specific phenotypes of histone H4 point  
603 mutants establish dosage compensation as the critical function of H4K16 acetylation in *Drosophila*.  
604 *Proceedings of the National Academy of Sciences*. 2018;115(52):13336–13341.  
605 doi:10.1073/pnas.1817274115
- 606 20. Cornett EM, Ferry L, Defossez PA, Rothbart SB. Lysine Methylation Regulators Moonlighting outside  
607 the Epigenome. *Molecular Cell*. 2019 [accessed 2020 Oct 1];75(6):1092–1101.  
608 [/pmc/articles/PMC6756181/?report=abstract](https://www.sciencedirect.com/journal/molecular-cell/abstract/S0962892419000026). doi:10.1016/j.molcel.2019.08.026
- 609 21. D.A. Case, I.Y. Ben-Shalom, S.R. Brozell, D.S. Cerutti, T.E. Cheatham, III, V.W.D. Cruzeiro, T.A. Darden,  
610 R.E. Duke, D. Ghoreishi, M.K. Gilson, H. Gohlke, A.W. Goetz, D. Greene, R Harris, N. Homeyer, Y. Huang,  
611 S. Izadi, A. Kovalenko, T. Kurtzman, T.S. Lee DMY and PAK, Case DA, Walker RC, Cheatham TE,  
612 Simmerling C, Roitberg A, Merz KM, Luo R, Darden T, D.A. Case, I.Y. Ben-Shalom, S.R. Brozell, D.S.  
613 Cerutti, T.E. Cheatham, III, V.W.D. Cruzeiro, T.A. Darden, R.E. Duke, D. Ghoreishi, M.K. Gilson, H. Gohlke,  
614 A.W. Goetz, D. Greene, R Harris, N. Homeyer, Y. Huang, S. Izadi, A. Kovalenko, T. Kurtzman, T.S. Lee DMY  
615 and PAK, et al. Amber 2018. University of California, San Francisco. 2018. 2018:1–923.  
616 <http://ambermd.org/doc12/Amber18.pdf>
- 617 22. Dhama GK, Liu H, Galka M, Voss C, Wei R, Muranko K, Kaneko T, Cregan SP, Li L, Li SS-C. Dynamic  
618 Methylation of Numb by Set8 Regulates Its Binding to p53 and Apoptosis. *Molecular Cell*. 2013 [accessed  
619 2019 Sep 24];50(4):565–576.  
620 <https://www.sciencedirect.com/science/article/pii/S109727651300333X?via%3Dihub>.  
621 doi:10.1016/J.MOLCEL.2013.04.028
- 622 23. Dhama GK, Liu H, Galka M, Voss C, Wei R, Muranko K, Kaneko T, Cregan SP, Li L, Li SSC. Dynamic

- 623 Methylation of Numb by Set8 Regulates Its Binding to p53 and Apoptosis. *Molecular Cell*.  
624 2013;50(4):565–576. doi:10.1016/j.molcel.2013.04.028
- 625 24. Dillon SC, Zhang X, Trievel RC, Cheng X. The SET-domain protein superfamily: Protein lysine  
626 methyltransferases. *Genome Biology*. 2005 [accessed 2021 Dec 6];6(8):1–10.  
627 <https://genomebiology.biomedcentral.com/articles/10.1186/gb-2005-6-8-227>. doi:10.1186/GB-2005-6-  
628 8-227/FIGURES/4
- 629 25. Dorighi KM, Swigut T, Henriques T, Bhanu N V., Scruggs BS, Nady N, Still CD, Garcia BA, Adelman K,  
630 Wysocka J. Mll3 and Mll4 Facilitate Enhancer RNA Synthesis and Transcription from Promoters  
631 Independently of H3K4 Monomethylation. *Molecular Cell*. 2017 [accessed 2020 Sep 23];66(4):568-  
632 576.e4. /pmc/articles/PMC5662137/?report=abstract. doi:10.1016/j.molcel.2017.04.018
- 633 26. Dulev S, Tkach J, Lin S, Batada NN. SET 8 methyltransferase activity during the DNA double-strand  
634 break response is required for recruitment of 53 BP 1 . *EMBO reports*. 2014;15(11):1163–1174.  
635 doi:10.15252/embr.201439434
- 636 27. Fang J, Feng Q, Ketel CS, Wang H, Cao R, Xia L, Erdjument-Bromage H, Tempst P, Simon JA, Zhang Y.  
637 Purification and Functional Characterization of SET8, a Nucleosomal Histone H4-Lysine 20-Specific  
638 Methyltransferase not static. Dynamic changes in chromatin structure play important roles in many  
639 biological processes, such as DNA replication, repair, reco. 2002.
- 640 28. Faragó A, Ürmösi A, Farkas A, Bodai L. The histone replacement gene His4r is involved in heat stress  
641 induced chromatin rearrangement. *Scientific Reports* 2021 11:1. 2021 [accessed 2021 Dec 2];11(1):1–15.  
642 <https://www.nature.com/articles/s41598-021-84413-4>. doi:10.1038/s41598-021-84413-4
- 643 29. Fumasoni I, Meani N, Rambaldi D, Scafetta G, Alcalay M, Ciccarelli FD. Family expansion and gene  
644 rearrangements contributed to the functional specialization of PRDM genes in vertebrates. *BMC*  
645 *Evolutionary Biology* 2007 7:1. 2007 [accessed 2021 Sep 20];7(1):1–11.  
646 <https://bmcecolvol.biomedcentral.com/articles/10.1186/1471-2148-7-187>. doi:10.1186/1471-2148-7-  
647 187
- 648 30. Götz AW, Williamson MJ, Xu D, Poole D, Le Grand S, Walker RC. Routine Microsecond  
649 MolecularDynamics Simulationswith AMBER on GPUs. 1. Generalized Born. *Journal of Chemical Theory*  
650 *and Computation*. 2012 [accessed 2022 Jan 4];8(5):1542. /pmc/articles/PMC3348677/.  
651 doi:10.1021/CT200909J
- 652 31. Hamidi T, Singh AK, Veland N, Vemulapalli V, Chen J, Hardikar S, Bao J, Fry CJ, Yang V, Lee KA, et al.  
653 Identification of Rpl29 as a major substrate of the lysine methyltransferase Set7/9. *The Journal of*  
654 *biological chemistry*. 2018 [accessed 2022 Jan 5];293(33):12770–12780.  
655 <https://pubmed.ncbi.nlm.nih.gov/29959229/>. doi:10.1074/JBC.RA118.002890
- 656 32. Hayashi-Takanaka Y, Hayashi Y, Hirano Y, Miyawaki-Kuwakado A, Ohkawa Y, Obuse C, Kimura H,  
657 Haraguchi T, Hiraoka Y. Chromatin loading of MCM hexamers is associated with di-/tri-methylation of  
658 histone H4K20 toward S phase entry. *Nucleic Acids Research*. 2021 [accessed 2022 Jan 4];49(21):12152–  
659 12166. <https://academic.oup.com/nar/article/49/21/12152/6426064>. doi:10.1093/NAR/GKAB1068
- 660 33. Houston SI, McManus KJ, Adams MM, Sims JK, Carpenter PB, Hendzel MJ, Rice JC. Catalytic function  
661 of the PR-Set7 histone H4 lysine 20 monomethyltransferase is essential for mitotic entry and genomic  
662 stability. *The Journal of biological chemistry*. 2008 [accessed 2019 Jun 20];283(28):19478–88.  
663 <http://www.ncbi.nlm.nih.gov/pubmed/18480059>. doi:10.1074/jbc.M710579200

- 664 34. Huen MSY, Sy SM-H, van Deursen JM, Chen J. Direct interaction between SET8 and proliferating cell  
665 nuclear antigen couples H4-K20 methylation with DNA replication. *The Journal of biological chemistry*.  
666 2008 [accessed 2019 Jun 7];283(17):11073–7. <http://www.ncbi.nlm.nih.gov/pubmed/18319261>.  
667 doi:10.1074/jbc.C700242200
- 668 35. Jiang F, Liu Q, Wang Y, Zhang J, Wang H, Song T, Yang M, Wang X, Kang L. Comparative genomic  
669 analysis of SET domain family reveals the origin, expansion, and putative function of the arthropod-  
670 specific SmydA genes as histone modifiers in insects. *GigaScience*. 2017 [accessed 2021 Dec 6];6(6):1–  
671 16. <https://academic.oup.com/gigascience/article/6/6/gix031/3748233>.  
672 doi:10.1093/GIGASCIENCE/GIX031
- 673 36. Jørgensen S, Elvers I, Trelle MB, Menzel T, Eskildsen M, Jensen ON, Helleday T, Helin K, Sørensen CS.  
674 The histone methyltransferase SET8 is required for S-phase progression. *Journal of Cell Biology*.  
675 2007;179(7):1337–1345. doi:10.1083/jcb.200706150
- 676 37. Julien E, Herr W. A switch in mitotic histone H4 lysine 20 methylation status is linked to M phase  
677 defects upon loss of HCF-1. *Molecular Cell*. 2004;14(6):713–725. doi:10.1016/j.molcel.2004.06.008
- 678 38. Kalakonda N, Fischle W, Boccuni P, Gurvich N, Hoya-Arias R, Zhao X, Miyata Y, MacGrogan D, Zhang J,  
679 Sims JK, et al. Histone H4 lysine 20 monomethylation promotes transcriptional repression by L3MBTL1.  
680 *Oncogene*. 2008 [accessed 2019 Jun 17];27(31):4293–4304.  
681 <http://www.nature.com/articles/onc200867>. doi:10.1038/onc.2008.67
- 682 39. Kapoor-Vazirani P, Vertino PM. A dual role for the histone methyltransferase PR-SET7/SETD8 and  
683 histone H4 lysine 20 monomethylation in the local regulation of RNA polymerase II pausing. *Journal of*  
684 *Biological Chemistry*. 2014;289(11):7425–7437. doi:10.1074/jbc.M113.520783
- 685 40. Karachentsev D, Sarma K, Reinberg D, Steward R. PR-Set7-dependent methylation of histone H4 Lys  
686 20 functions in repression of gene expression and is essential for mitosis. *Genes and Development*.  
687 2005;19(4):431–435. doi:10.1101/gad.1263005
- 688 41. Leatham-Jensen M, Uyehara CM, Strahl BD, Matera AG, Duronio RJ, McKay DJ. Lysine 27 of  
689 replication-independent histone H3.3 is required for Polycomb target gene silencing but not for gene  
690 activation. *PLOS Genetics*. 2019 [accessed 2021 Sep 20];15(1):e1007932.  
691 <https://journals.plos.org/plosgenetics/article?id=10.1371/journal.pgen.1007932>.  
692 doi:10.1371/JOURNAL.PGEN.1007932
- 693 42. Li Y, Armstrong RL, Duronio RJ, Macalpine DM. Methylation of histone H4 lysine 20 by PR-Set7  
694 ensures the integrity of late replicating sequence domains in *Drosophila*. *Nucleic Acids Research*.  
695 2016;44(15):7204–7218. doi:10.1093/nar/gkw333
- 696 43. Li Y, Sun L, Zhang Y, Wang D, Wang F, Liang J, Gui B, Shang Y. The histone modifications governing  
697 TFF1 transcription mediated by estrogen receptor. *The Journal of biological chemistry*. 2011 [accessed  
698 2019 Aug 7];286(16):13925–36. <http://www.ncbi.nlm.nih.gov/pubmed/21378170>.  
699 doi:10.1074/jbc.M111.223198
- 700 44. Li Z, Nie F, Wang S, Li L. Histone H4 Lys 20 monomethylation by histone methylase SET8 mediates  
701 Wnt target gene activation. *Proceedings of the National Academy of Sciences of the United States of*  
702 *America*. 2011;108(8):3116–3123. doi:10.1073/pnas.1009353108
- 703 45. Lukinović V, Casanova AG, Roth GS, Chuffart F, Reynoird N. Lysine Methyltransferases Signaling:  
704 Histones are Just the Tip of the Iceberg. *Current protein & peptide science*. 2020 [accessed 2022 Jan

- 705 5];21(7):655–674. <https://pubmed.ncbi.nlm.nih.gov/31894745/>.  
706 doi:10.2174/1871527319666200102101608
- 707 46. Lv X, Han Z, Chen H, Yang B, Yang X, Xia Y, Pan C, Fu L, Zhang S, Han H, et al. A positive role for  
708 polycomb in transcriptional regulation via H4K20me1. *Cell Research*. 2016;26(5):529–542.  
709 doi:10.1038/cr.2016.33
- 710 47. Maier JA, Martinez C, Kasavajhala K, Wickstrom L, Hauser KE, Simmerling C. ff14SB: Improving the  
711 accuracy of protein side chain and backbone parameters from ff99SB. *Journal of chemical theory and*  
712 *computation*. 2015 [accessed 2022 Jan 4];11(8):3696. /pmc/articles/PMC4821407/.  
713 doi:10.1021/ACS.JCTC.5B00255
- 714 48. Manes G, Joly W, Guignard T, Smirnov V, Berthemy S, Bocquet B, Audo I, Zeitz C, Sahel J, Cazevielle  
715 C, et al. A novel duplication of PRMD13 causes North Carolina macular dystrophy: overexpression of  
716 PRDM13 orthologue in drosophila eye reproduces the human phenotype. *Human Molecular Genetics*.  
717 2017 [accessed 2021 Sep 20];26(22):4367–4374.  
718 <https://academic.oup.com/hmg/article/26/22/4367/4085843>. doi:10.1093/HMG/DDX322
- 719 49. McKay DJ, Klusza S, Penke TJR, Meers MP, Curry KP, McDaniel SL, Malek PY, Cooper SW, Tatomer DC,  
720 Lieb JD, et al. Interrogating the function of metazoan histones using engineered gene clusters.  
721 *Developmental Cell*. 2015;32(3):373–386. doi:10.1016/j.devcel.2014.12.025
- 722 50. Meers MP, Adelman K, Duronio RJ, Strahl BD, McKay DJ, Matera AG. Transcription start site profiling  
723 uncovers divergent transcription and enhancer-associated RNAs in *Drosophila melanogaster*. *BMC*  
724 *Genomics* 2018 19:1. 2018 [accessed 2021 Sep 20];19(1):1–20.  
725 <https://bmcgenomics.biomedcentral.com/articles/10.1186/s12864-018-4510-7>. doi:10.1186/S12864-  
726 018-4510-7
- 727 51. Meers MP, Henriques T, Lavender CA, McKay DJ, Strahl BD, Duronio RJ, Adelman K, Matera AG.  
728 Histone gene replacement reveals a posttranscriptional role for H3K36 in maintaining metazoan  
729 transcriptome fidelity. *eLife*. 2017;6. doi:10.7554/ELIFE.23249
- 730 52. Meers MP, Leatham-Jensen M, Penke TJR, McKay DJ, Duronio RJ, Matera AG. An Animal Model for  
731 Genetic Analysis of Multi-Gene Families: Cloning and Transgenesis of Large Tandemly Repeated Histone  
732 Gene Clusters. *Methods in Molecular Biology*. 2018 [accessed 2021 Sep 20];1832:309–325.  
733 [https://link.springer.com/protocol/10.1007/978-1-4939-8663-7\\_17](https://link.springer.com/protocol/10.1007/978-1-4939-8663-7_17). doi:10.1007/978-1-4939-8663-7\_17
- 734 53. Meserve JH, Duronio RJ. A population of G2-arrested cells are selected as sensory organ precursors  
735 for the interommatidial bristles of the *Drosophila* eye. *Developmental Biology*. 2017;430(2):374–384.  
736 doi:10.1016/j.ydbio.2017.06.023
- 737 54. Milite C, Feoli A, Viviano M, Rescigno D, Cianciulli A, Balzano AL, Mai A, Castellano S, Sbardella G. The  
738 emerging role of lysine methyltransferase SETD8 in human diseases. *Clinical Epigenetics*. 2016;8(1).  
739 doi:10.1186/s13148-016-0268-4
- 740 55. Minakhina S, Steward R. Melanotic Mutants in *Drosophila*: Pathways and Phenotypes. *Genetics*.  
741 2006 [accessed 2022 Jan 7];174(1):253–263.  
742 <https://academic.oup.com/genetics/article/174/1/253/6061187>. doi:10.1534/GENETICS.106.061978
- 743 56. Mis J, Ner SS, Grigliatti TA. Identification of three histone methyltransferases in *Drosophila*: dG9a is a  
744 suppressor of PEV and is required for gene silencing. *Molecular Genetics and Genomics*. 2006 [accessed  
745 2021 Dec 6];275(6):513–526. <https://link.springer.com/article/10.1007/s00438-006-0116-x>.

746 doi:10.1007/S00438-006-0116-X/TABLES/2

747 57. Mohan M, Herz H-M, Smith ER, Zhang Y, Jackson J, Washburn MP, Florens L, Eissenberg JC,  
748 Shilatifard A. The COMPASS Family of H3K4 Methylases in Drosophila. *Molecular and Cellular Biology*.  
749 2011 [accessed 2021 Dec 6];31(21):4310–4318. [https://journals.asm.org/doi/abs/10.1128/MCB.06092-](https://journals.asm.org/doi/abs/10.1128/MCB.06092-11)  
750 11. doi:10.1128/MCB.06092-11/ASSET/B99FA20A-F1B0-4422-BE8A-  
751 927BA0E4090C/ASSETS/GRAPHIC/ZMB9991092610007.JPEG

752 58. Nakamura K, Saredi G, Becker JR, Foster BM, Nguyen N V., Beyer TE, Cesa LC, Faull PA, Lukauskas S,  
753 Frimurer T, et al. H4K20me0 recognition by BRCA1–BARD1 directs homologous recombination to sister  
754 chromatids. *Nature Cell Biology*. 2019;21(3):311–318. doi:10.1038/s41556-019-0282-9

755 59. Nikolaou KC, Moulos P, Chalepakis G, Hatzis P, Oda H, Reinberg D, Talianidis I. Spontaneous  
756 development of hepatocellular carcinoma with cancer stem cell properties in PR-SET7-deficient livers.  
757 *The EMBO Journal*. 2015;34(4):430–447. doi:10.15252/embj.201489279

758 60. Nishioka K, Chuikov S, Sarma K, Erdjument-Bromage H, Allis CD, Tempst P, Reinberg D. Set9, a novel  
759 histone H3 methyltransferase that facilitates transcription by precluding histone tail modifications  
760 required for heterochromatin formation. *Genes and Development*. 2002;16(4):479–489.  
761 doi:10.1101/gad.967202

762 61. Nishioka K, Rice JC, Sarma K, Erdjument-Bromage H, Werner J, Wang Y, Chuikov S, Valenzuela P,  
763 Tempst P, Steward R, et al. PR-Set7 is a nucleosome-specific methyltransferase that modifies lysine 20 of  
764 histone H4 and is associated with silent chromatin. *Molecular cell*. 2002;9(6):1201–13.  
765 <http://www.ncbi.nlm.nih.gov/pubmed/12086618>

766 62. Oda H, Hübner MR, Beck DB, Vermeulen M, Hurwitz J, Spector DL, Reinberg D. Regulation of the  
767 Histone H4 Monomethylase PR-Set7 by CRL4Cdt2-Mediated PCNA-Dependent Degradation during DNA  
768 Damage. *Molecular Cell*. 2010 [accessed 2019 Aug 5];40(3):364–376.  
769 <https://www.sciencedirect.com/science/article/pii/S1097276510007872?via%3Dihub>

770 63. Oda H, Okamoto I, Murphy N, Chu J, Price SM, Shen MM, Torres-Padilla ME, Heard E, Reinberg D.  
771 Monomethylation of Histone H4-Lysine 20 Is Involved in Chromosome Structure and Stability and Is  
772 Essential for Mouse Development. *Molecular and Cellular Biology*. 2009;29(8):2278–2295.  
773 <http://mcb.asm.org/cgi/doi/10.1128/MCB.01768-08>. doi:10.1128/MCB.01768-08

774 64. Pannetier M, Julien E, Schotta G, Tardat M, Sardet C, Jenuwein T, Feil R. PR-SET7 and SUV4-20H  
775 regulate H4 lysine-20 methylation at imprinting control regions in the mouse. *EMBO Reports*.  
776 2008;9(10):998–1005. doi:10.1038/embo.2008.147

777 65. Penke TJR, McKay DJ, Strahl BD, Matera AG, Duronio RJ. Direct interrogation of the role of H3K9 in  
778 metazoan heterochromatin function. *Genes & Development*. 2016 [accessed 2021 Sep 20];30(16):1866–  
779 1880. <http://genesdev.cshlp.org/content/30/16/1866.full>. doi:10.1101/GAD.286278.116

780 66. Penke TJR, McKay DJ, Strahl BD, Matera AG, Duronio RJ. Functional Redundancy of Variant and  
781 Canonical Histone H3 Lysine 9 Modification in Drosophila. *Genetics*. 2018 [accessed 2021 Sep  
782 20];208(1):229–244. <https://academic.oup.com/genetics/article/208/1/229/6066502>.  
783 doi:10.1534/GENETICS.117.300480

784 67. Pesavento JJ, Yang H, Kelleher NL, Mizzen CA. Certain and Progressive Methylation of Histone H4 at  
785 Lysine 20 during the Cell Cycle. *Molecular and Cellular Biology*. 2008;28(1):468–486.  
786 doi:10.1128/mcb.01517-07

- 787 68. Rickels R, Herz HM, Sze CC, Cao K, Morgan MA, Collings CK, Gause M, Takahashi YH, Wang L,  
788 Rendleman EJ, et al. Histone H3K4 monomethylation catalyzed by Trr and mammalian COMPASS-like  
789 proteins at enhancers is dispensable for development and viability. *Nature Genetics*. 2017;49(11):1647–  
790 1653. doi:10.1038/ng.3965
- 791 69. Rothbart SB, Strahl BD. Interpreting the language of histone and DNA modifications. *Biochimica et*  
792 *Biophysica Acta - Gene Regulatory Mechanisms*. 2014;1839(8):627–643.  
793 doi:10.1016/j.bbagr.2014.03.001
- 794 70. Sakaguchi A, Joyce E, Aoki T, Schedl P, Steward R. The Histone H4 Lysine 20 Monomethyl Mark, Set  
795 by PR-Set7 and Stabilized by L(3)mbt, Is Necessary for Proper Interphase Chromatin Organization. Imhof  
796 A, editor. *PLoS ONE*. 2012 [accessed 2019 Aug 20];7(9):e45321.  
797 <https://dx.plos.org/10.1371/journal.pone.0045321>. doi:10.1371/journal.pone.0045321
- 798 71. Sakaguchi A, Karachentsev D, Seth-Pasricha M, Druzhinina M, Steward R. Functional characterization  
799 of the drosophila Hmt4-20/Suv4-20 histone methyltransferase. *Genetics*. 2008;179(1):317–322.  
800 doi:10.1534/genetics.108.087650
- 801 72. Sakaguchi A, Steward R. Aberrant monomethylation of histone H4 lysine 20 activates the DNA  
802 damage checkpoint in *Drosophila melanogaster*. *Journal of Cell Biology*. 2007;176(2):155–162.  
803 doi:10.1083/jcb.200607178
- 804 73. Salomon-Ferrer R, Götz AW, Poole D, Le Grand S, Walker RC. Routine Microsecond Molecular  
805 Dynamics Simulations with AMBER on GPUs. 2. Explicit Solvent Particle Mesh Ewald. *Journal of chemical*  
806 *theory and computation*. 2013 [accessed 2022 Jan 4];9(9):3878–3888.  
807 <https://pubmed.ncbi.nlm.nih.gov/26592383/>. doi:10.1021/CT400314Y
- 808 74. Schotta G, Lachner M, Sarma K, Ebert A, Sengupta R, Reuter G, Reinberg D, Jenuwein T. A silencing  
809 pathway to induce H3-K9 and H4-K20 trimethylation at constitutive heterochromatin. *Genes and*  
810 *Development*. 2004;18(11):1251–1262. doi:10.1101/gad.300704
- 811 75. Schotta G, Sengupta R, Kubicek S, Malin S, Kauer M, Callén E, Celeste A, Pagani M, Opravil S, De La  
812 Rosa-Velazquez IA, et al. A chromatin-wide transition to H4K20 monomethylation impairs genome  
813 integrity and programmed DNA rearrangements in the mouse. *Genes & development*. 2008 [accessed  
814 2019 Sep 26];22(15):2048–61. <http://www.ncbi.nlm.nih.gov/pubmed/18676810>.  
815 doi:10.1101/gad.476008
- 816 76. Shi X, Kachirskaja I, Yamaguchi H, West LE, Wen H, Wang EW, Dutta S, Appella E, Gozani O.  
817 Modulation of p53 Function by SET8-Mediated Methylation at Lysine 382. *Molecular Cell*.  
818 2007;27(4):636–646. doi:10.1016/j.molcel.2007.07.012
- 819 77. Shilatifard A. The COMPASS Family of Histone H3K4 Methylases: Mechanisms of Regulation in  
820 Development and Disease Pathogenesis. <http://dx.doi.org/10.1146/annurev-biochem-051710-134100>.  
821 2012 [accessed 2021 Dec 6];81:65–95. <https://www.annualreviews.org/doi/abs/10.1146/annurev-biochem-051710-134100>. doi:10.1146/ANNUREV-BIOCHEM-051710-134100
- 822
- 823 78. Shoaib M, Chen Q, Shi X, Nair N, Prasanna C, Yang R, Walter D, Frederiksen KS, Einarsson H, Svensson  
824 JP, et al. Histone H4 lysine 20 mono-methylation directly facilitates chromatin openness and promotes  
825 transcription of housekeeping genes. *Nature Communications* 2021 12:1. 2021 [accessed 2021 Sep  
826 29];12(1):1–16. <https://www.nature.com/articles/s41467-021-25051-2>. doi:10.1038/s41467-021-25051-  
827 2

- 828 79. Shoaib M, Walter D, Gillespie PJ, Izard F, Fahrenkrog B, Lleres D, Lerdrup M, Johansen JV, Hansen K,  
829 Julien E, et al. Histone H4K20 methylation mediated chromatin compaction threshold ensures genome  
830 integrity by limiting DNA replication licensing. *Nature Communications*. 2018;9(1). doi:10.1038/s41467-  
831 018-06066-8
- 832 80. Sims JK, Rice JC. PR-Set7 Establishes a Repressive trans-Tail Histone Code That Regulates  
833 Differentiation. *Molecular and Cellular Biology*. 2008;28(14):4459–4468. doi:10.1128/mcb.00410-08
- 834 81. Spektor TM, Congdon LM, Veerappan CS, Rice JC. The UBC9 E2 sumo conjugating enzyme binds the  
835 PR-Set7 histone methyltransferase to facilitate target gene repression. *PLoS ONE*. 2011;6(7).  
836 doi:10.1371/journal.pone.0022785
- 837 82. Sugeedha J, Gautam J, Tyagi S. SET1/MLL family of proteins: functions beyond histone methylation.  
838 *Epigenetics*. 2021 [accessed 2022 Jan 5];16(5):469–487. <https://pubmed.ncbi.nlm.nih.gov/32795105/>.  
839 doi:10.1080/15592294.2020.1809873
- 840 83. Takawa M, Cho HS, Hayami S, Toyokawa G, Kogure M, Yamane Y, Iwai Y, Maejima K, Ueda K, Masuda  
841 A, et al. Histone lysine methyltransferase setd8 promotes carcinogenesis by deregulating PCNA  
842 expression. *Cancer Research*. 2012;72(13):3217–3227. doi:10.1158/0008-5472.CAN-11-3701
- 843 84. Tardat M, Brustel J, Kirsh O, Lefevbre C, Callanan M, Sardet C, Julien E. The histone H4 Lys 20  
844 methyltransferase PR-Set7 regulates replication origins in mammalian cells. *Nature Cell Biology*.  
845 2010;12(11):1086–1093. doi:10.1038/ncb2113
- 846 85. Tardat M, Brustel J, Kirsh O, Lefevbre C, Callanan M, Sardet C, Julien E. The histone H4 Lys 20  
847 methyltransferase PR-Set7 regulates replication origins in mammalian cells. *Nature Cell Biology*.  
848 2010;12(11):1086–1093. doi:10.1038/ncb2113
- 849 86. Tardat M, Murr R, Herceg Z, Sardet C, Julien E. PR-Set7-dependent lysine methylation ensures  
850 genome replication and stability through S phase. *Journal of Cell Biology*. 2007;179(7):1413–1426.  
851 doi:10.1083/jcb.200706179
- 852 87. Thandapani P, Couturier AM, Yu Z, Li X, Couture JF, Li S, Masson JY, Richard S. Lysine methylation of  
853 FEN1 by SET7 is essential for its cellular response to replicative stress. *Oncotarget*. 2017 [accessed 2022  
854 Jan 5];8(39):64918–64931. <https://pubmed.ncbi.nlm.nih.gov/29029401/>.  
855 doi:10.18632/ONCOTARGET.18070
- 856 88. Tullio F Di, Schwarz M, Zorgati H, Mzoughi S, Guccione E. The duality of PRDM proteins: epigenetic  
857 and structural perspectives. *The FEBS Journal*. 2021 [accessed 2021 Sep 20].  
858 <https://onlinelibrary.wiley.com/doi/full/10.1111/febs.15844>. doi:10.1111/FEBS.15844
- 859 89. Wakabayashi K -i., Okamura M, Tsutsumi S, Nishikawa NS, Tanaka T, Sakakibara I, Kitakami J -i., Ihara  
860 S, Hashimoto Y, Hamakubo T, et al. The Peroxisome Proliferator-Activated Receptor  $\gamma$ /Retinoid X  
861 Receptor Heterodimer Targets the Histone Modification Enzyme PR-Set7/Setd8 Gene and Regulates  
862 Adipogenesis through a Positive Feedback Loop. *Molecular and Cellular Biology*. 2009;29(13):3544–  
863 3555. doi:10.1128/mcb.01856-08
- 864 90. Wakabayashi K, Okamura M, Tsutsumi S, Nishikawa NS, Tanaka T, Sakakibara I, Kitakami J, Ihara S,  
865 Hashimoto Y, Hamakubo T, et al. The peroxisome proliferator-activated receptor  $\gamma$ /retinoid X  
866 receptor  $\alpha$  heterodimer targets the histone modification enzyme PR-Set7/Setd8 gene and regulates  
867 adipogenesis through a positive feedback loop. *Molecular and cellular biology*. 2009 [accessed 2019 Jun  
868 28];29(13):3544–55. <http://www.ncbi.nlm.nih.gov/pubmed/19414603>. doi:10.1128/MCB.01856-08

- 869 91. Wang H, Cao R, Xia L, Erdjument-Bromage H, Borchers C, Tempst P, Zhang Y. Purification and  
870 Functional Characterization of a Histone H3-Lysine 4-Specific Methyltransferase. *Molecular Cell*.  
871 2001;8(6):1207–1217. doi:10.1016/S1097-2765(01)00405-1
- 872 92. Weirich S, Kudithipudi S, Jeltsch A. Specificity of the SUV4-20H1 and SUV4-20H2 protein lysine  
873 methyltransferases and methylation of novel substrates. *Journal of Molecular Biology*.  
874 2016;428(11):2344–2358. doi:10.1016/j.jmb.2016.04.015
- 875 93. West LE, Roy S, Lachmi-Weiner K, Hayashi R, Shi X, Appella E, Kutateladze TG, Gozani O. The MBT  
876 repeats of L3MBTL1 link SET8-mediated p53 methylation at lysine 382 to target gene repression. *Journal*  
877 *of Biological Chemistry*. 2010;285(48):37725–37732. doi:10.1074/jbc.M110.139527
- 878 94. Wolff T, Ready DF. The beginning of pattern formation in the *Drosophila* compound eye: The  
879 morphogenetic furrow and the second mitotic wave. *Development*. 1991;113(3):841–850.
- 880 95. Wu S, Rice JC. A new regulator of the cell cycle: The PR-Set7 histone methyltransferase. *Cell Cycle*.  
881 2011;10(1):68–72. doi:10.4161/cc.10.1.14363
- 882 96. Wu S, Wang W, Kong X, Congdon LM, Yokomori K, Kirschner MW, Rice JC. Dynamic regulation of the  
883 PR-Set7 histone methyltransferase is required for normal cell cycle progression. *Genes and*  
884 *Development*. 2010;24(22):2531–2542. doi:10.1101/gad.1984210
- 885 97. Yang F, Sun L, Li Q, Han X, Lei L, Zhang H, Shang Y. SET8 promotes epithelial-mesenchymal transition  
886 and confers TWIST dual transcriptional activities. *The EMBO Journal*. 2012 [accessed 2019 Aug  
887 8];31(1):110–123. <http://emboj.embopress.org/cgi/doi/10.1038/emboj.2011.364>.  
888 doi:10.1038/emboj.2011.364
- 889 98. Yang H, Pesavento JJ, Starnes TW, Cryderman DE, Wallrath LL, Kelleher NL, Mizzen CA. Preferential  
890 dimethylation of histone H4 lysine 20 by Suv4-20. *Journal of Biological Chemistry*. 2008;283(18):12085–  
891 12092. doi:10.1074/jbc.M707974200
- 892 99. Yao L, Li Y, Du F, Han X, Li X, Niu Y, Ren S, Sun Y. Histone H4 Lys 20 methyltransferase SET8 promotes  
893 androgen receptor-mediated transcription activation in prostate cancer. *Biochemical and Biophysical*  
894 *Research Communications*. 2014 [accessed 2019 Nov 20];450(1):692–696.  
895 <https://linkinghub.elsevier.com/retrieve/pii/S0006291X14011073>. doi:10.1016/j.bbrc.2014.06.033
- 896 100. Yin L, Yu VC, Zhu G, Chang DC. SET8 plays a role in controlling G1/S transition by blocking lysine  
897 acetylation in histone through binding to H4 N-terminal tail. *Cell Cycle*. 2008;7(10):1423–1432.  
898 doi:10.4161/cc.7.10.5867
- 899 101. Yu G. Using ggtree to Visualize Data on Tree-Like Structures. *Current Protocols in Bioinformatics*.  
900 2020 [accessed 2021 Dec 3];69(1):e96. <https://onlinelibrary.wiley.com/doi/full/10.1002/cpbi.96>.  
901 doi:10.1002/CPBI.96
- 902 102. Yu G, Lam TTY, Zhu H, Guan Y. Two Methods for Mapping and Visualizing Associated Data on  
903 Phylogeny Using Ggtree. *Molecular Biology and Evolution*. 2018 [accessed 2021 Dec 3];35(12):3041–  
904 3043. <https://academic.oup.com/mbe/article/35/12/3041/5142656>. doi:10.1093/MOLBEV/MSY194
- 905 103. Yu G, Smith DK, Zhu H, Guan Y, Lam TTY. ggtree: an r package for visualization and annotation of  
906 phylogenetic trees with their covariates and other associated data. *Methods in Ecology and Evolution*.  
907 2017 [accessed 2021 Dec 3];8(1):28–36. <https://onlinelibrary.wiley.com/doi/full/10.1111/2041-210X.12628>.  
908 210X.12628. doi:10.1111/2041-210X.12628



- 909 104. Yu N, Huangyang P, Yang X, Han X, Yan R, Jia H, Shang Y, Sun L. microRNA-7 Suppresses the Invasive  
910 Potential of Breast Cancer Cells and Sensitizes Cells to DNA Damages by Targeting Histone  
911 Methyltransferase SET8. *Journal of Biological Chemistry*. 2013 [accessed 2019 Nov 20];288(27):19633–  
912 19642. <http://www.jbc.org/lookup/doi/10.1074/jbc.M113.475657>. doi:10.1074/jbc.M113.475657
- 913 105. Yu Y, Liu L, Li X, Hu X, Song H. The histone H4K20 methyltransferase PR-Set7 fine-tunes the  
914 transcriptional activation of Wingless signaling in *Drosophila*. *Journal of Genetics and Genomics*.  
915 2019;46(1):57–59. doi:10.1016/j.jgg.2018.06.009
- 916 106. Zhang J, Hou W, Chai M, Zhao H, Jia J, Sun X, Zhao B, Wang R. MicroRNA-127-3p inhibits  
917 proliferation and invasion by targeting SETD8 in human osteosarcoma cells. *Biochemical and Biophysical*  
918 *Research Communications*. 2016 [accessed 2019 Nov 20];469(4):1006–1011.  
919 <https://linkinghub.elsevier.com/retrieve/pii/S0006291X1531072X>. doi:10.1016/j.bbrc.2015.12.067
- 920 107. Zhang X, Huang Y, Shi X. Emerging roles of lysine methylation on non-histone proteins. *Cellular and*  
921 *molecular life sciences : CMLS*. 2015 [accessed 2022 Jan 5];72(22):4257–4272.  
922 <https://pubmed.ncbi.nlm.nih.gov/26227335/>. doi:10.1007/S00018-015-2001-4
- 923 108. Zouaz A, Fernando C, Perez Y, Sardet C, Julien E, Grimaud C. Cell-cycle regulation of non-enzymatic  
924 functions of the *Drosophila* methyltransferase PR-Set7. *Nucleic Acids Research*. 2018;46(6):2834–2849.  
925 doi:10.1093/nar/gky034
- 926



A

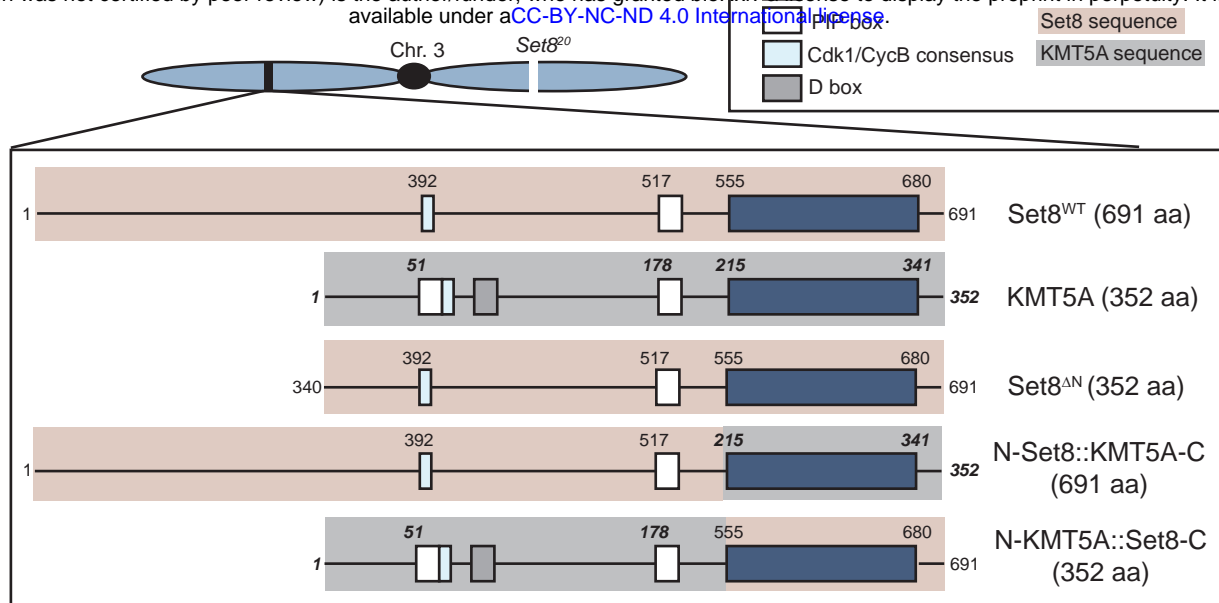

B

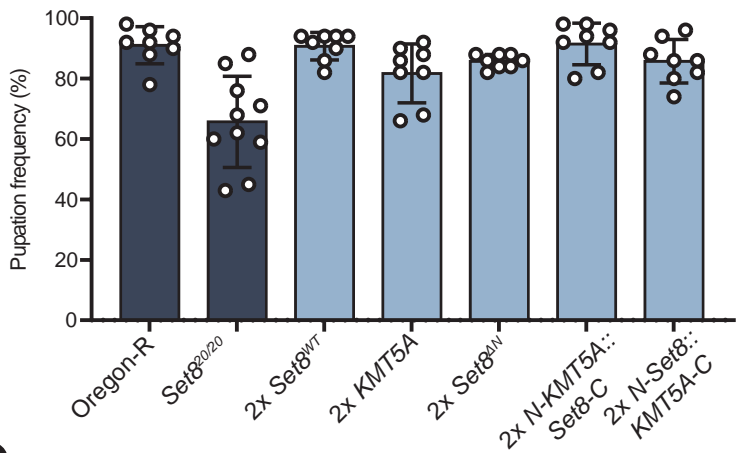

C

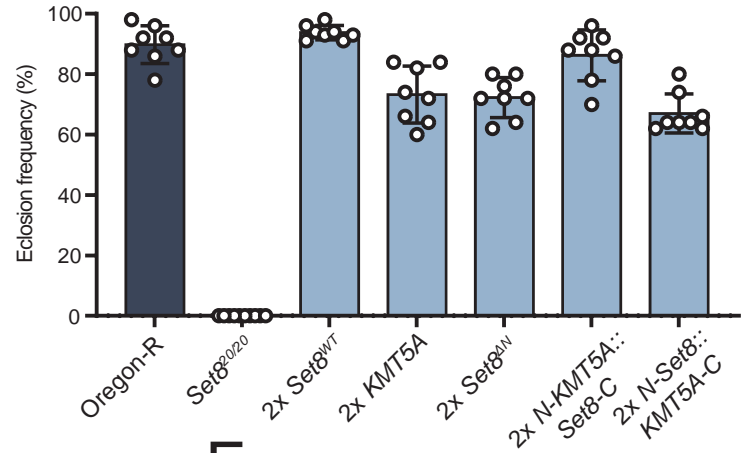

D

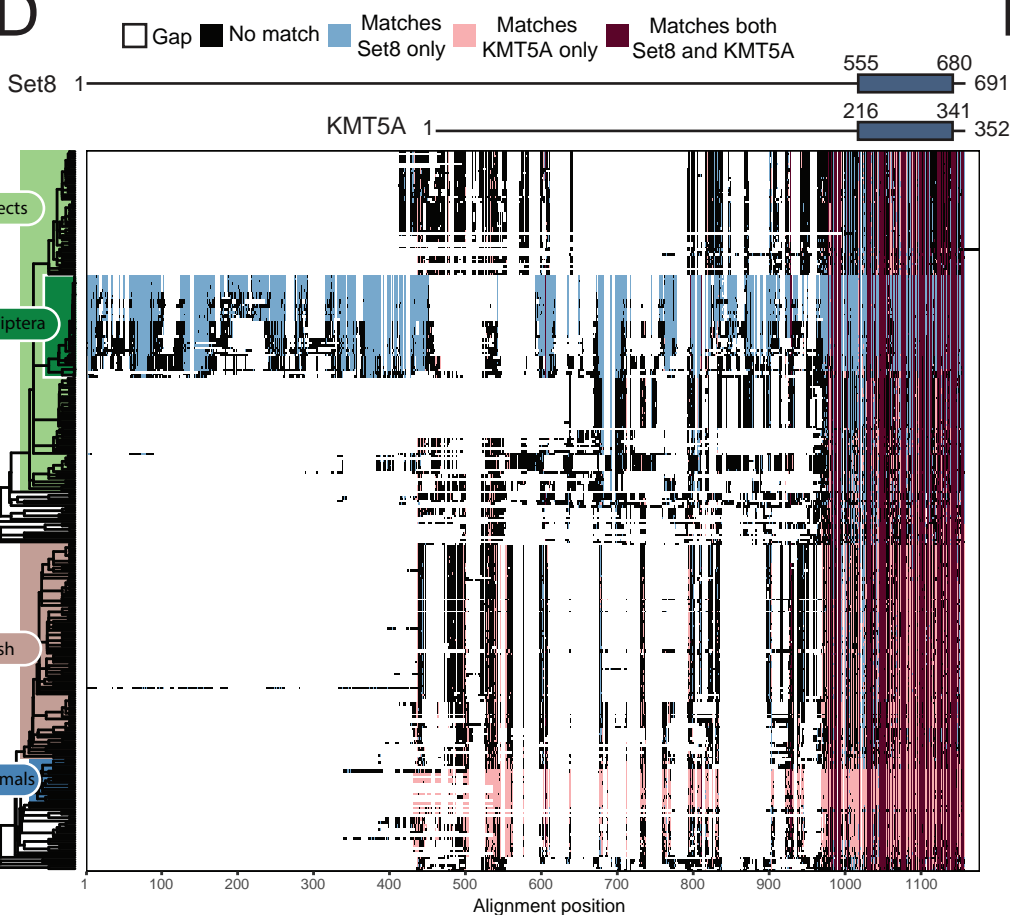

E

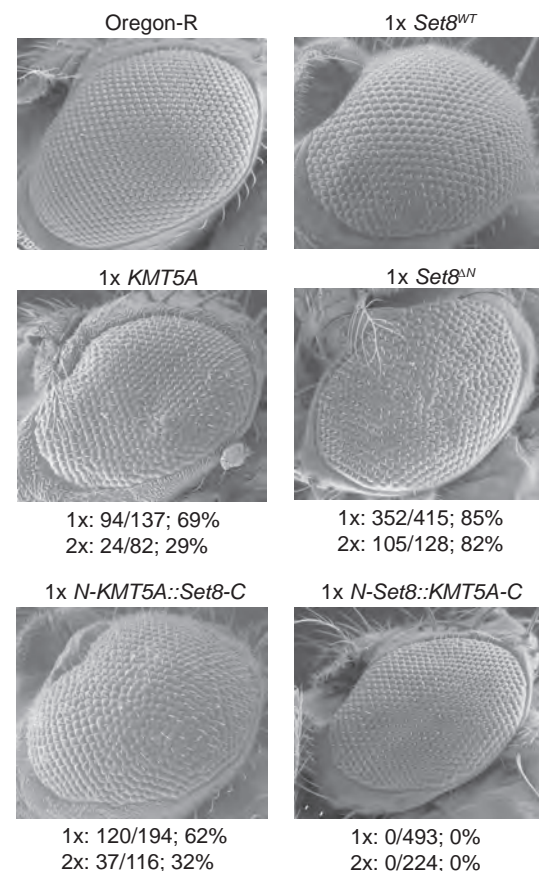

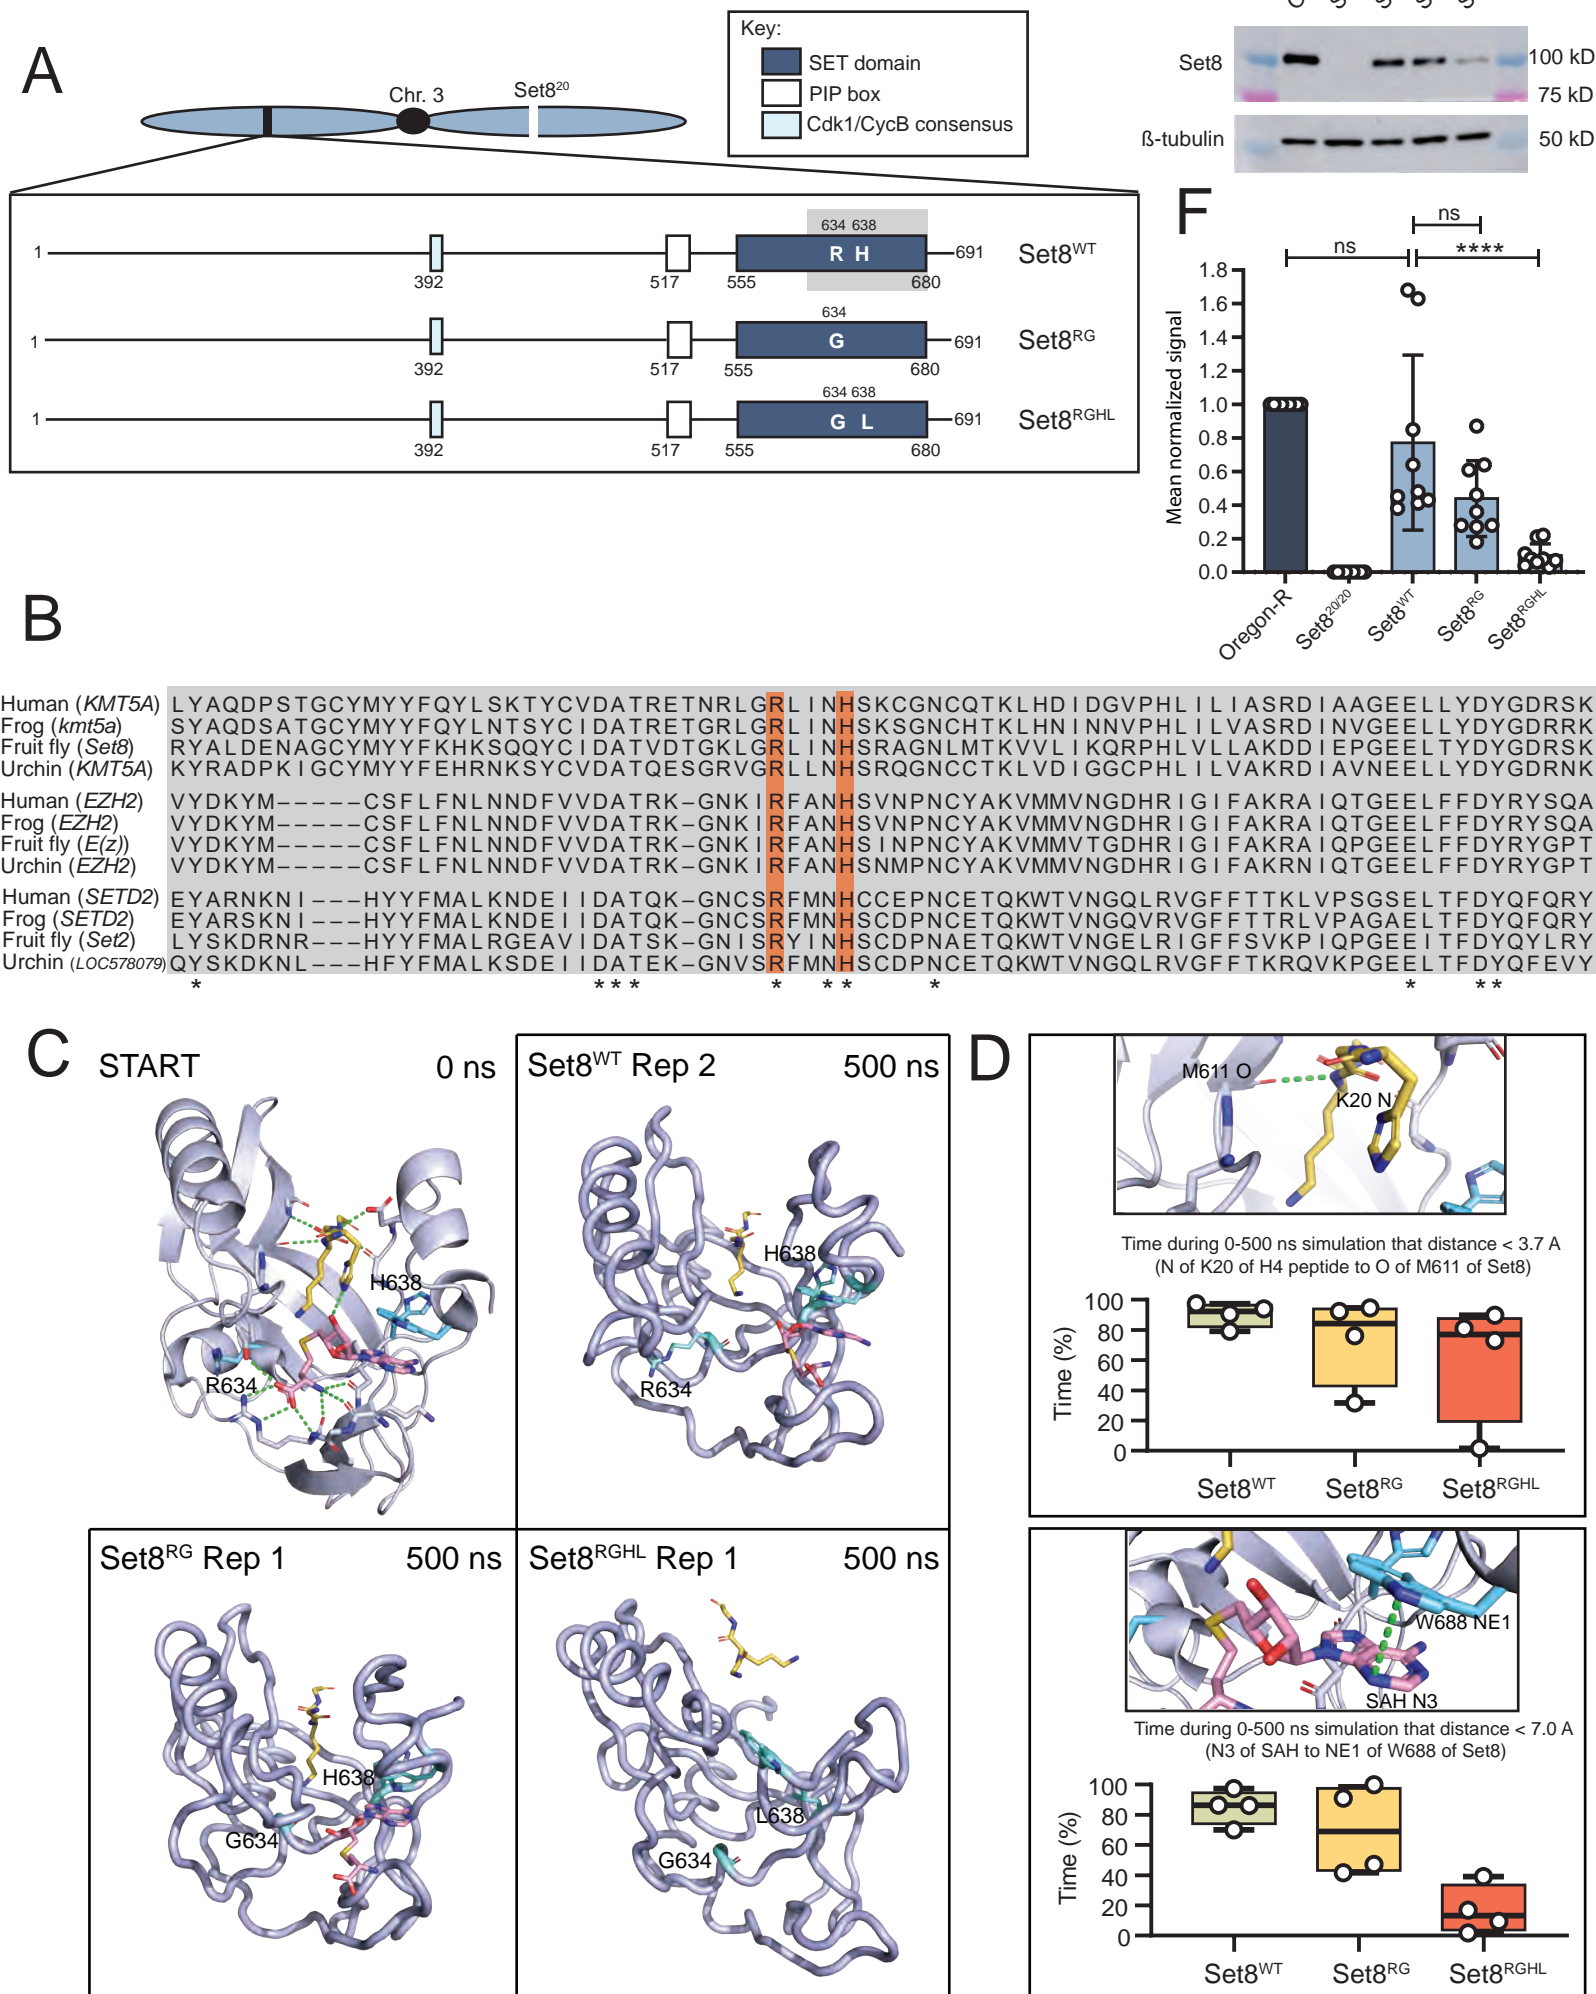

**A**

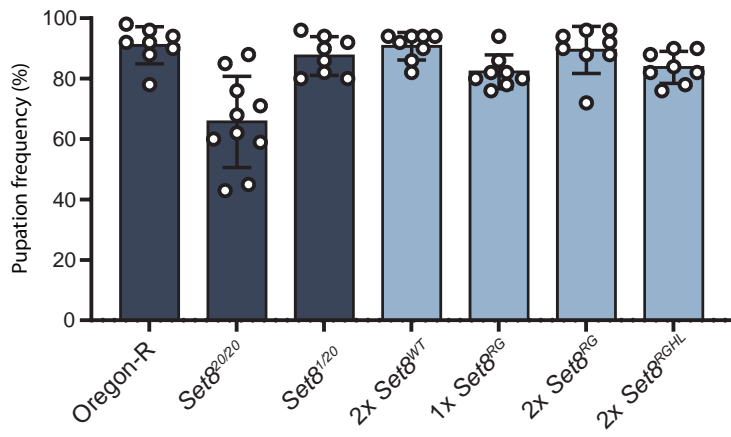

**B**

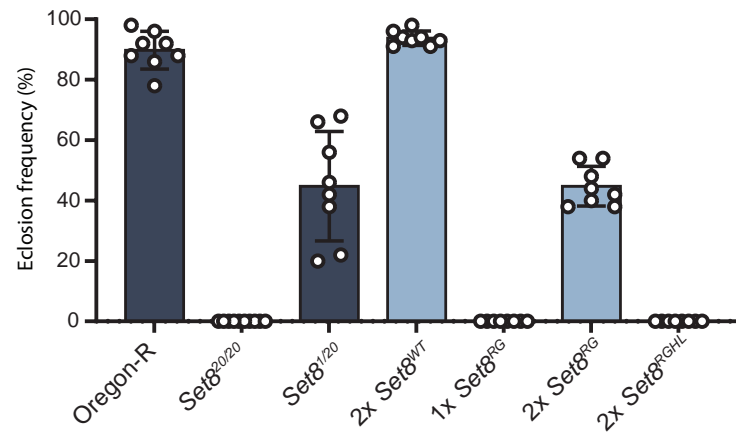

**C**

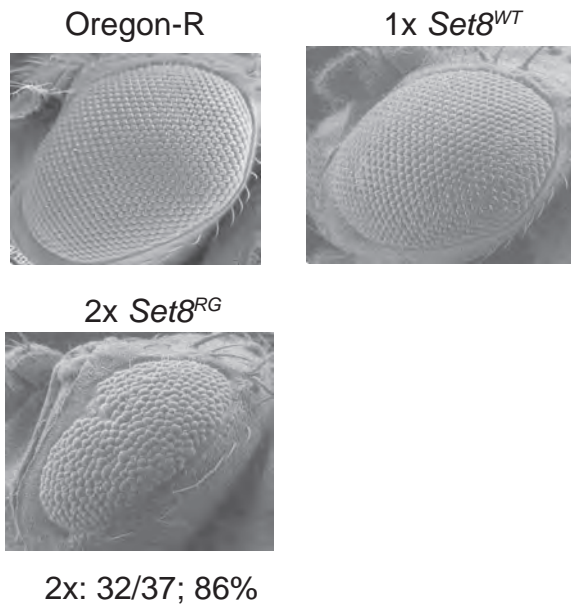

**D**

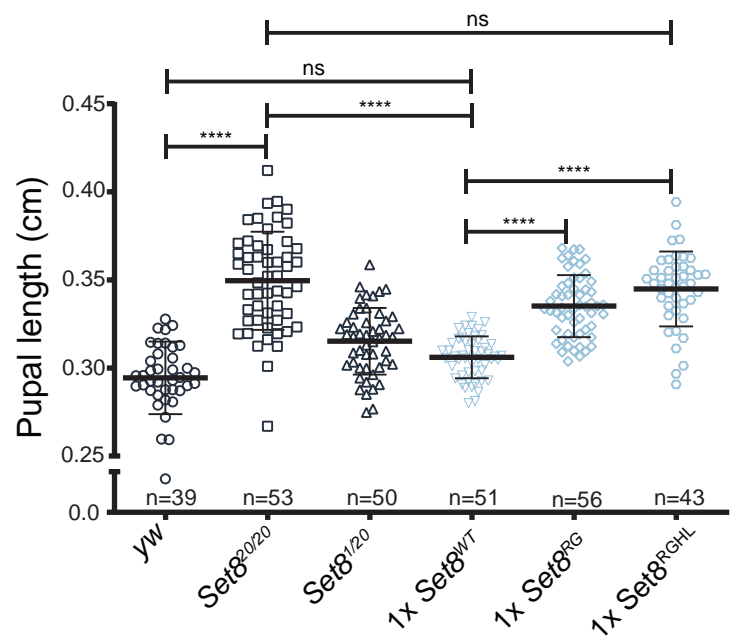

**A**

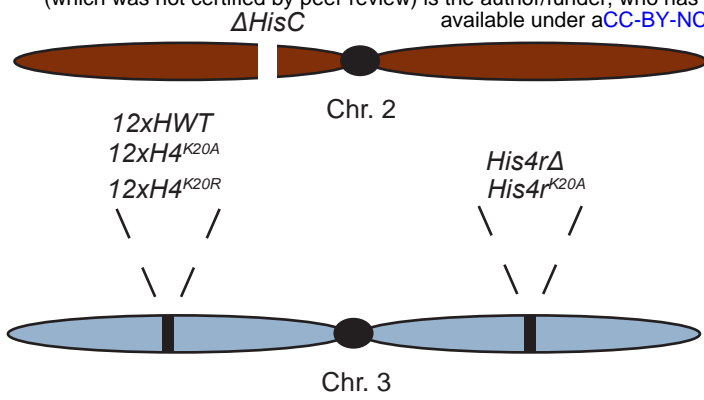

**B** Cell cycle profile of *Set8* and *H4K20* mutants

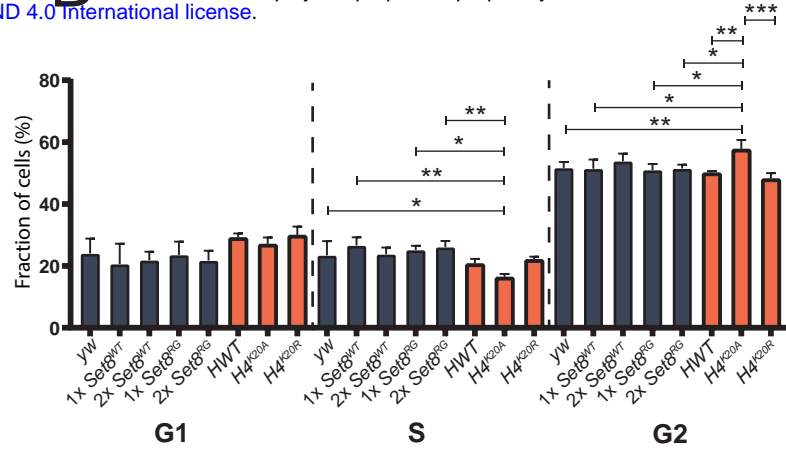

**C**

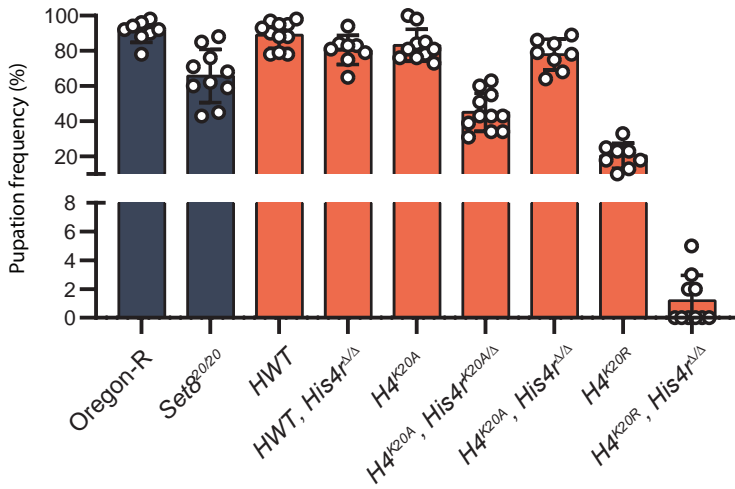

**D**

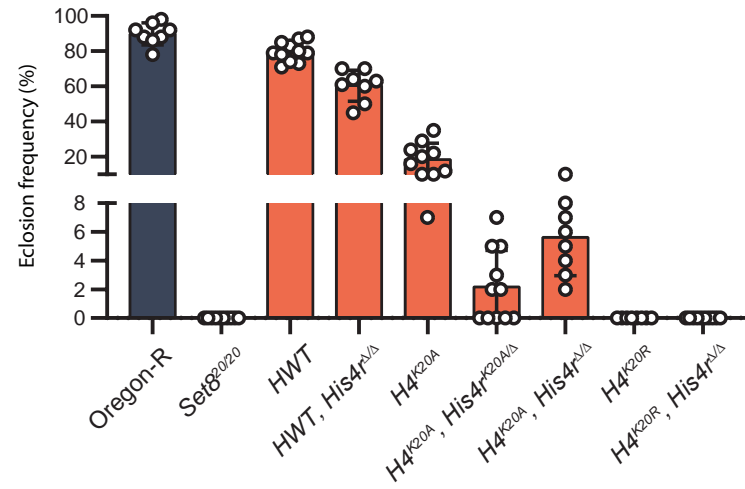

**E**

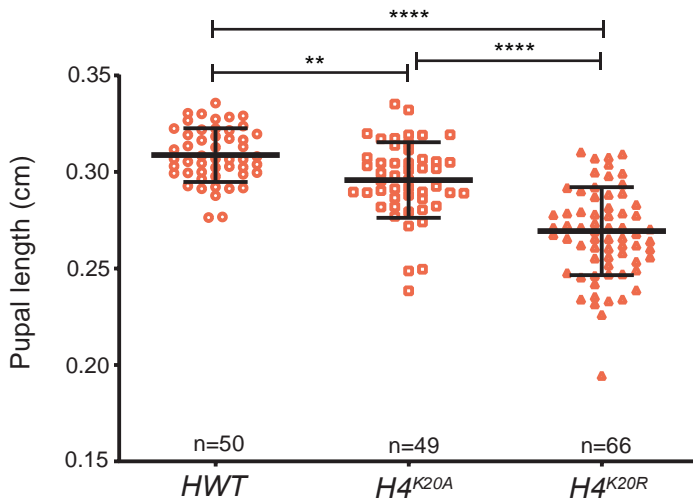

**F**

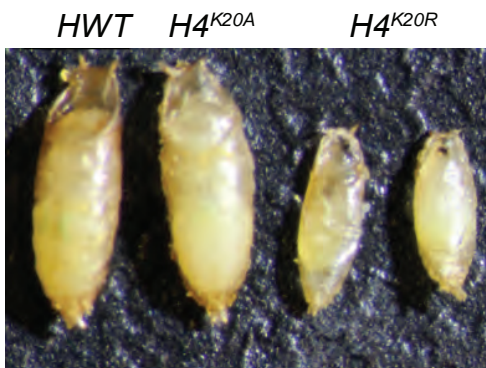

**G**

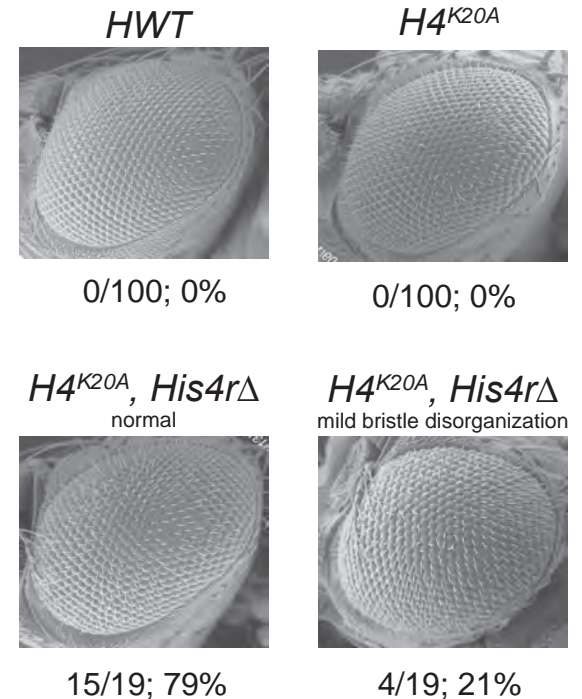

Source: https://www.biorxiv.org/content/10.1101/2022.01.30.478405v1.full.pdf
